1                    **Analysis of neuronal Ca<sup>2+</sup> handling properties by combining**  
2                    **perforated patch clamp recordings and the added buffer approach**  
3

4  
5                    Simon Hess<sup>1\*</sup>, Christophe Pouzat<sup>2\*</sup>, Lars Paeger<sup>1</sup>, Andreas Pippow<sup>1</sup>, Peter Kloppenburg<sup>1</sup>  
6

7                    <sup>1</sup> Institute for Zoology, Biocenter, and Cologne Excellence Cluster in Aging Associated  
8                    Diseases (CECAD), University of Cologne, Cologne, Germany. <sup>2</sup> Université de Paris, CNRS,  
9                    MAP5 UMR 8145, 45, rue des Saints-Pères, 75006 PARIS, France  
10

11                    Running Head: Improved analysis of Ca<sup>2+</sup> handling

12                    \*Authors who contributed equally  
13

14                    Contact:

15                    Peter Kloppenburg

16                    Institute for Zoology

17                    Biocenter

18                    University of Cologne

19                    Zùlpicher Str. 47b

20                    50674 Cologne

21                    Germany

22                    Email: peter.kloppenburg@uni-koeln.de

23                    T: +49-221-470-5950

24                    F: +49-221-470-4889  
25  
26  
27  
28  
29  
30  
31  
32  
33

34                    **Keywords**

35                    added buffer approach,  $\beta$ -escin, calcium-binding ratio, calcium buffering, cerebellum, fura-2,  
36                    midbrain, perforated patch clamp  
37

38                    **Acknowledgments**

39                    We thank Helmut Wratil for excellent technical assistance. This work was supported by grant  
40                    SFB 1218/TP B07 from the Deutsche Forschungsgemeinschaft to PK.  
41

42                    **Competing Interests**

43                    The authors declare that they have no competing interests.  
44

45 **Abstract**

46  $\text{Ca}^{2+}$  functions as an important intracellular signal for a wide range of cellular processes.  
47 These processes are selectively activated by controlled spatiotemporal dynamics of the free  
48 cytosolic  $\text{Ca}^{2+}$ . Intracellular  $\text{Ca}^{2+}$  dynamics are regulated by numerous cellular parameters.  
49 Here, we established a new way to determine neuronal  $\text{Ca}^{2+}$  handling properties by combining  
50 the ‘added buffer’ approach (Neher and Augustine, 1992) with perforated patch-clamp  
51 recordings (Horn and Marty, 1988). Since the added buffer approach typically employs the  
52 standard whole-cell configuration for concentration-controlled  $\text{Ca}^{2+}$  indicator loading, it only  
53 allows for the reliable estimation of the immobile fraction of intracellular  $\text{Ca}^{2+}$  buffers.  
54 Furthermore, crucial components of intracellular signaling pathways are being washed out  
55 during prolonged whole-cell recordings, leading to cellular deterioration. By combining the  
56 added buffer approach with perforated patch-clamp recordings, these issues are circumvented,  
57 allowing the precise quantification of the cellular  $\text{Ca}^{2+}$  handling properties, including  
58 immobile as well as mobile  $\text{Ca}^{2+}$  buffers.

59

## 60 **Introduction**

61 This study combined perforated patch clamp recordings with ratiometric  $\text{Ca}^{2+}$  imaging  
62 and the 'added buffer approach' to achieve significant improvements in the quantitative  
63 analysis of neuronal  $\text{Ca}^{2+}$  handling. In neurons,  $\text{Ca}^{2+}$  serves as a ubiquitous signal in a wide  
64 range of cellular processes, including the synaptic release of neurotransmitters, membrane  
65 excitability, enzyme activation, and activity-dependent gene activation (Augustine et al.,  
66 2003; Berridge, 1998; Clapham, 2007; Gilibert, 2020). These processes are selectively  
67 regulated by controlled spatiotemporal dynamics of the free cytosolic  $\text{Ca}^{2+}$  (Berridge, 2006;  
68 Berridge et al., 2000). Intracellular  $\text{Ca}^{2+}$  dynamics are regulated by numerous cellular  
69 parameters ( $\text{Ca}^{2+}$  handling parameters) including  $\text{Ca}^{2+}$  influx through voltage- and ligand-  
70 gated  $\text{Ca}^{2+}$  channels,  $\text{Ca}^{2+}$  release from intracellular stores, the location of the  $\text{Ca}^{2+}$  source,  
71  $\text{Ca}^{2+}$  buffering by mobile and immobile buffers,  $\text{Ca}^{2+}$  extrusion, locally changing diffusion  
72 coefficients as well as the geometry of the cell (Helmchen et al., 1996; Kloppenburg et al.,  
73 2000; Lin et al., 2017; Maravall et al., 2000; Neher and Augustine, 1992; Sabatini et al., 2002;  
74 Tank et al., 1995). Impairment of this finely tuned system can cause neuronal dysfunction and  
75 even neurodegeneration (Berridge, 2011; Chan et al., 2009). Neuronal  $\text{Ca}^{2+}$  handling  
76 properties have been, up to now, analyzed by combining electrophysiological recordings and  
77  $\text{Ca}^{2+}$  imaging into what is referred to as the 'added buffer' approach (Neher and Augustine,  
78 1992).

79 The added buffer approach is based on a single-compartment model with the following  
80 rationale. During the measurement of intracellular  $\text{Ca}^{2+}$  dynamics with  $\text{Ca}^{2+}$  chelator-based  
81 indicators, the amplitude and time course of the  $\text{Ca}^{2+}$  signals (free cytosolic  $\text{Ca}^{2+}$   
82 concentration) are influenced by the concentration of the  $\text{Ca}^{2+}$  indicator (e.g., fura-2), since  
83 the indicator acts as an exogenous (added)  $\text{Ca}^{2+}$  buffer and competes with the endogenous  
84 buffer(s). Accordingly, increasing indicator concentrations reduce the amplitude and prolong  
85 the decay time constants of free intracellular  $\text{Ca}^{2+}$  fluctuations (Helmchen et al., 1996; Neher

86 and Augustine, 1992; Pippow et al., 2009). If the buffering capacity ( $\text{Ca}^{2+}$  binding ratio) of the  
87 added buffer is known, the decay time constant can be used to estimate the  $\text{Ca}^{2+}$  signal  
88 kinetics in the absence of exogenous buffer. The model of the original added buffer approach  
89 (Neher and Augustine, 1992) provides estimates of  $\text{Ca}^{2+}$  handling parameters such as the free  
90 cytosolic  $\text{Ca}^{2+}$  concentration ( $[\text{Ca}^{2+}]_i$ ), the  $\text{Ca}^{2+}$  extrusion rate ( $\gamma$ ), the  $\text{Ca}^{2+}$  binding ratio ( $\kappa_B$ ),  
91 and the endogenous decay time constant ( $\tau_{\text{endo}}$ ).

92 The added buffer approach relies on information about the precise exogenous  $\text{Ca}^{2+}$   
93 buffer concentration in the neuron. Typically, the  $\text{Ca}^{2+}$  indicator concentration can be  
94 determined at any time during the experiment from loading curves. The neurons are loaded  
95 *via* the patch pipette, whose solution contains a known  $\text{Ca}^{2+}$  indicator concentration. During  
96 loading, fluorescence is monitored continuously, and it is assumed that when the fluorescence  
97 reaches a plateau, the indicator concentrations in the cell and the pipette are equal. Loading is  
98 usually performed in the whole-cell patch clamp configuration since this recording  
99 configuration provides low access resistance, ensuring that the solution in the patch pipette  
100 can freely interchange with the cytoplasm. Thus, the whole-cell configuration is ideally suited  
101 to “control” the composition of the intracellular milieu, including the  $\text{Ca}^{2+}$  indicator (added  
102  $\text{Ca}^{2+}$  buffer) concentration (what is in the patch pipette ends up being what is in the neuron).  
103 However, the free exchange of molecules between cytoplasm and patch pipette disturbs  
104 intracellular signaling by washing out components of the cytosolic signaling system,  
105 including, for example, mobile cytosolic  $\text{Ca}^{2+}$  buffers. This not only impairs neuronal function  
106 but also causes estimation errors of the  $\text{Ca}^{2+}$  handling properties (Akaike, 1994; Akaike and  
107 Harata, 1994; Delvendahl et al., 2015; Lindau and Fernandez, 1986; Matthews et al., 2013).

108 For pure electrophysiological recordings, this issue can be minimized or even ignored  
109 by using the perforated patch clamp configuration originally introduced by Horn and Marty  
110 (Horn and Marty, 1988). In this recording configuration, electrical access between the  
111 recording pipette and the intracellular space is mediated by perforating agents that form

112 channels or pores in the membrane. The washout of cytosolic components and the disruption  
113 of intracellular signaling pathways are then drastically reduced compared to the whole-cell  
114 configuration (Korn and Horn, 1989). The original and most commonly used perforating  
115 agents have been the antibiotic polyenes nystatin and amphotericin B, and the antibiotic  
116 polypeptide gramicidin (Akaike, 1994; Akaike and Harata, 1994; Hess et al., 2013; Horn and  
117 Marty, 1988; Klöckener et al., 2011; Könner et al., 2011; Kyrozis and Reichling, 1995). While  
118 polyenes and the peptide exhibit differences in their pore-forming mechanisms and ion  
119 selectivities (De Kruijff and Demel, 1974; Myers and Haydon, 1972; Russell et al., 1977;  
120 Tajima et al., 1996), their pores share key common properties: they are permeable to small  
121 molecules with a molecular weight up to ~200 Da, including monovalent ions (Kruijff et al.,  
122 1974; Kyrozis and Reichling, 1995; Urry, 1971), but they are neither permeable to divalent  
123 ions like  $\text{Ca}^{2+}$  nor to  $\text{Ca}^{2+}$  indicators like fura-2 (whose molecular weight is >600 Da). While  
124 the combination of perforated patch clamp recordings and the added buffer approach would  
125 be ideal, it cannot be implemented with the previous standard small pore-forming perforating  
126 agents.

127 To alleviate the “small pore size” problem, we tried  $\beta$ -escin as the perforating agent.  $\beta$ -  
128 escin is a saponin (Sirtori, 2001) and is structurally not related to the previous perforating  
129 agents. The action of saponins on biological membranes is concentration-dependent and  
130 complex. Most models of its action propose that membrane permeabilization is mediated by  
131 cholesterol complexation (formation of saponin-cholesterol complexes), which disturbs the  
132 normal membrane structure or, at high concentrations, removes the cholesterol from the  
133 membrane (Bangham et al., 1962; Böttger and Melzig, 2013). Since the pore size is generally  
134 larger and accordingly less selective compared to the ones of nystatin, amphotericin B and  
135 gramicidin, molecules of higher molecular weight (e.g., fluo-3, MW 770 Da) can pass through  
136 the cell membrane (Fan and Palade, 1998; Orta et al., 2012). Nevertheless,  $\beta$ -escin  
137 permeabilized membrane still constitutes an effective diffusion barrier to larger molecules like

138  $\text{Ca}^{2+}$  binding proteins (Fan and Palade, 1998; Sarantopoulos et al., 2004). In previous studies,  
139  $\beta$ -escin has been successfully used to permeabilize smooth muscle cells (Kobayashi et al.,  
140 1989) and  $\beta$ -escin based perforated patch clamp recordings have been performed on cardiac  
141 myocytes (Fan and Palade, 1998) and different neuron types (Inoue et al., 2014;  
142 Sarantopoulos et al., 2004).

143 Here, we combined  $\beta$ -escin based perforated patch clamp recordings with the added  
144 buffer approach to measure intracellular  $\text{Ca}^{2+}$  handling properties. A thorough quantitative  
145 analysis of the data showed that this approach leads to a significantly improved quantification  
146 of the  $\text{Ca}^{2+}$  handling properties of individual neurons from brain slices of adult mice. The core  
147 experiments were performed on *substantia nigra* (SN) dopaminergic (DA) neurons from brain  
148 slices of adult mice. SN DA neurons are endogenous pacemakers and rely very heavily on  
149 intact, precisely orchestrated intracellular pathways, especially cytosolic  $\text{Ca}^{2+}$  signaling.  
150 Additionally, we performed a set of immunohistochemical experiments in cerebellar Purkinje  
151 cells, a cell type which is known for containing very high concentrations of calbindin D-28k,  
152 a mobile  $\text{Ca}^{2+}$  binding protein (Abe et al., 1992).

153

154 **Results**

155 The goal of this study was to implement the ‘added buffer approach’, a powerful  
156 method to determine neuronal  $\text{Ca}^{2+}$  handling properties, in combination with perforated patch  
157 clamp recordings, which allow for electrophysiological recordings without compromising  
158 intracellular signaling. Since the typical perforating agents, nystatin, amphotericin B, and  
159 gramicidin, do not allow controlled loading of  $\text{Ca}^{2+}$  indicators, we explored the suitability of  
160  $\beta$ -escin for this purpose. This study was performed in brain slices of mice, mainly on DA SN  
161 neurons. These neurons are particularly well suited to test this experimental approach since  
162 they are endogenous pacemakers (Fig. 1) that strongly rely on intact, precisely controlled  $\text{Ca}^{2+}$   
163 signaling (Bean, 2007; Lacey et al., 1989; Richards et al., 1997).

164 The first part of the study shows that  $\beta$ -escin enables long-lasting, high quality  
165 perforated, patch clamp recordings with minimal rundown. The quality of these recordings is  
166 comparable to amphotericin B perforated recordings. In the second part, we show that  $\beta$ -escin  
167 perforated patch clamp recordings allow controlled  $\text{Ca}^{2+}$  indicator loading and can  
168 significantly improve the added buffer approach to analyze the  $\text{Ca}^{2+}$  handling properties of  
169 individual neurons. We achieved controlled fura-2 loading with a minimized impact on the  
170 integrity of the cells' cytoplasmic components. A thorough quantitative analysis of the data  
171 shows that this approach significantly improves the quantification of  $\text{Ca}^{2+}$  handling properties  
172 in single neurons of adult animals compared to conventional whole-cell recordings. The  
173 versatility of this new approach is complemented by immunohistochemical stainings of  
174 cerebellar Purkinje cells, which possess very high concentrations of the mobile  $\text{Ca}^{2+}$ -binding  
175 protein calbindin D-28k. Here we could show that calbindin D-28k is retained during  $\beta$ -escin  
176 perforated patch clamp recordings, which is in stark contrast to results obtained during whole-  
177 cell patch clamp recordings.

178

179  *$\beta$ -escin as perforating agent for perforated patch clamp recordings*

180 After GΩ-seal formation, the perforation of the cell membrane was monitored by  
181 continuously measuring the membrane potential and the amplitude of the action potentials.  
182 Initially, ‘on-cell’ action potentials were observed in the cell-attached configuration (Fig. 2A).  
183 Diffusion of β-escin into the membrane gradually changed the recording to the perforated-  
184 patch configuration, decreasing the series resistance and increasing the action potential  
185 amplitude (Fig. 2A from left to right). The perforation process was considered fully  
186 established when action potential amplitude and series resistance ( $R_S$ ) had stabilized. Under  
187 our experimental conditions, we observed that indicator loading started within ~5 min of seal  
188 formation, and perforation was fully established after ~20 min (Fig. 2B).

189

#### 190 *Comparison with other patch clamp configurations*

191 To compare the β-escin mediated recordings with other configurations of patch clamp  
192 recordings, we analyzed whether and how important intrinsic neurophysiological parameters  
193 such as spontaneous or evoked action potential firing, membrane potential, and resting  $Ca^{2+}$   
194 levels ( $[Ca^{2+}]_i$ ) are affected by the different recording configuration (whole-cell recordings,  
195 and amphotericin B- and β-escin perforated patch recordings). After establishing recordings  
196 with stable access (as judged by the series resistance), spontaneous and evoked action  
197 potential firing was monitored for at least 30 min. During whole-cell recordings, we observed  
198 a dramatic rundown of these parameters. As expected, they did not change during  
199 amphotericin B perforated-patch recordings. β-escin perforated-patch recordings gave results  
200 similar to amphotericin B mediated recordings, and only a small decline of the spontaneous  
201 firing was observed (Fig. 3A-D).

202 More specifically, during whole-cell recordings, more than 80% of the cells stopped  
203 spontaneous firing within 10 min after break-in (Fig. 3A, C). This loss of activity was  
204 accompanied by a ~4 fold increase in the resting  $[Ca^{2+}]_i$  levels after 30 min of recording time



205 (Fig. 4). This substantial rise in  $[Ca^{2+}]_i$  was a clear and direct indicator for the deteriorating  
206 physiological state of the neurons (Kuchibhotla et al., 2008; Mattson, 2007) and showed  
207 directly that the  $Ca^{2+}$  handling properties change during whole-cell recordings. In contrast,  
208  $[Ca^{2+}]_i$  remained stable during  $\beta$ -escin perforated patch recordings over the same time (Fig 4).  
209 Taken together,  $\beta$ -escin perforated patch clamp recordings significantly outperformed whole-  
210 cell recordings, and  $\beta$ -escin perforated patch clamp recordings were of similar quality to  
211 amphotericin B mediated recordings. Overall, the data are in line with many earlier studies  
212 (e.g. (Horn and Marty, 1988; Husch et al., 2011; Lindau and Fernandez, 1986)) which clearly  
213 show the impact of whole-cell recordings on the cytosolic integrity and to what extend  
214 perforated patch clamp can minimize this impact (rundown), and thus are suitable to analyze  
215 ‘true’ intrinsic neurophysiological parameters over long periods of time.

216

#### 217 *Permeability of $\beta$ -escin mediated pores*

218 Next, we tested if the  $\beta$ -escin perforated membranes are permeable to fura-2 and to  
219 molecules with a MW in the range of  $Ca^{2+}$  buffering proteins, like calbindin D-28k. To clarify  
220 this question, tetramethylrhodamine-dextran (TRD-40kDa, MW 40 kDa) or fura-2 was added  
221 to the pipette solution, and the fluorescence in the cell body was monitored during the  
222 recording. During  $\beta$ -escin perforated-patch recordings, the TRD-40kDa remained in the  
223 recording pipette, while it diffused into the neuron during whole-cell recordings (Fig 5).  
224 Furthermore, immunohistochemical staining showed that the endogenous calbindin-D28k  
225 remains in the cell during  $\beta$ -escin perforated patch clamp recordings but is washed out during  
226 whole-cell recordings (Supplement Fig. 1). In contrast, the loading curves for fura-2 (Fig. 6A)  
227 confirmed that fura-2 could diffuse readily through the  $\beta$ -escin perforated membrane into the  
228 cell. These results suggested that  $\beta$ -escin is well suited to implement the added buffer  
229 approach.

230

231 *Ca<sup>2+</sup> handling properties*

232        Given the stable and reliable recording conditions provided by  $\beta$ -escin, we combined  $\beta$ -  
233 escin perforated patch clamp recordings with ratiometric fura-2  $\text{Ca}^{2+}$  imaging to analyze  $\text{Ca}^{2+}$   
234 handling properties. Using the added buffer approach, we determined the resting  $\text{Ca}^{2+}$   
235 concentration ( $[\text{Ca}^{2+}]_i$ ), the  $\text{Ca}^{2+}$  binding ratio  $\kappa_S$ , and the extrusion rate  $\gamma$  of SN DA neurons,  
236 which display  $\text{Ca}^{2+}$  dependent endogenous pacemaking properties (Liu et al., 2014; Neuhoff  
237 et al., 2002; Smits et al., 2013). Neurons were held at -70 mV to avoid spontaneous spiking.  
238 Clear and reproducible  $\text{Ca}^{2+}$  influx could be induced by trains of action potentials elicited by  
239 current pulses (500 pA, 500 ms) (Fig. 6B). The resulting intracellular  $\text{Ca}^{2+}$  signals were  
240 monitored by ratiometric  $\text{Ca}^{2+}$  imaging (Fig 6C), and the data quality was compared with data  
241 acquired with conventional whole-cell patch clamp recordings.

242        Fura-2 loading: The intracellular concentration of the exogenous buffer at any time  
243 during the experiment was determined from the loading curves of the calcium indicator (Fig.  
244 6A). DA SN neurons were loaded *via* the patch pipette with solutions containing 100 – 200  
245  $\mu\text{M}$  fura-2. During dye loading, the fluorescence of the cell body was monitored in 30 s  
246 intervals using excitation at 360 nm (isosbestic point) to determine the dye concentration.  
247 After the  $\beta$ -escin perforated-patch configuration was fully established, fluorescence appeared  
248 in the cell bodies, and fluorescence intensity increased until it reached a stable plateau. The  
249 intracellular fura-2 concentration was estimated for different times during the loading curve,  
250 assuming that cells were fully loaded when the fluorescence reached a plateau and the fura-2  
251 concentration in the cell and the pipette is equal at this point (for details see Methods).

252         $\text{Ca}^{2+}$  handling properties: If the buffer capacity of the added buffer is known, the time  
253 constant of the transient decay ( $\tau_{\text{transient}}$ ) can be used to estimate by extrapolation the  $\text{Ca}^{2+}$   
254 signal to conditions, with only endogenous buffers present ( $-\kappa_B = 1 + \kappa_S$ ). The model used for  
255 this study (Eq. (14), (Neher and Augustine, 1992) assumes that the decay time constants  
256  $\tau_{\text{transient}}$  are a linear function of the  $\text{Ca}^{2+}$  binding ratios ( $\kappa_B$  and  $\kappa_S$ ).  $\kappa_S$  was determined from the

257 negative x-axis intercept of a  $\tau_{\text{transient}}$  over  $\kappa_{\text{S}}$  plot (Fig. 6D). The slope of the straight-line fit is  
258 the inverse of the extrusion rate ( $\gamma$ ). The point of intersection of the linear fit with the y-axis  
259 denotes the endogenous decay time constant  $\tau_{\text{endo}}$  (no exogenous  $\text{Ca}^{2+}$  buffer in the cell). This  
260 is demonstrated in Fig. 6 with an example of a DA SN neuron with following  $\text{Ca}^{2+}$  handling  
261 parameters:  $\tau_{\text{endo}}$ :  $0.7 \pm 0.3$  s,  $\gamma$ :  $91.5 \pm 10.4$ ,  $\text{s}^{-1}$ ,  $\kappa_{\text{S}}$ :  $66.4 \pm 24.7$ .

262

### 263 *Comparison of data quality between whole-cell and $\beta$ -escin perforated patch clamp* 264 *recordings*

265 The data quality of the  $\text{Ca}^{2+}$  imaging experiments used to determine the  $\text{Ca}^{2+}$  handling  
266 properties was markedly better for the  $\beta$ -escin perforated-patch configuration compared to  
267 whole-cell recordings. Obvious evidence of "low-quality" data were implausible results such  
268 as negative  $\text{Ca}^{2+}$  binding coefficients or  $\text{Ca}^{2+}$  transients that did not return to baseline as  
269 frequently observed by us and previous studies (Fierro and Llano, 1996; Pippow et al., 2009).  
270 For data sets that did not show such obvious flaws, an analysis on a finer scale confirmed the  
271 significantly higher data quality of the  $\beta$ -escin perforated records. For this purpose,  
272 parameters, which characterize the quality of data sets of individual neurons, were quantified.  
273 This included the goodness of fit for each  $\text{Ca}^{2+}$  transient (a mono-exponential fit) and the  
274 linear regression that was used to fit the  $\tau_{\text{transient}} - \kappa_{\text{B}}$  relation.

275 First, we tested the goodness of the mono-exponential fit for each  $\text{Ca}^{2+}$  transient. Since  
276 our analysis method yields a meaningful standard error for the estimated  $[\text{Ca}^{2+}]_{\text{i}}$  (see  
277 Methods), a fit obtained with a weighted nonlinear least-square produces standard errors for  
278 the estimated parameters (basal  $[\text{Ca}^{2+}]_{\text{i}}$ ,  $\Delta[\text{Ca}^{2+}]_{\text{i}}$  and, most importantly here,  $\tau_{\text{transient}}$ ) as well  
279 as residuals following a known distribution if the data do indeed follow the model; namely the  
280 residual sum of squares (RSS) should be the realization of a draw from a  $\chi^2$  distribution with a  
281 known number of degrees of freedom, and the residuals should not be correlated. We decided

282 to keep a transient for further analysis if both the p-values of the RSS and the auto-correlation  
283 at lag 1 were larger than 0.01 (giving a probability of false-negative of 0.02). Since the decay  
284 fits were started once the transient had lost 50% of the peak increase (see Materials and  
285 Methods), the number of data points used for each fit is not fixed, meaning that the number of  
286 degrees of freedom of the  $\chi^2$  distribution associated with each RSS is also changing. A proxy  
287 of the RSS that is easy to compare from transient to transient is the RSS per degree of  
288 freedom (that should be close to 1 for a good fit) and is illustrated in Fig. 7C. This goodness  
289 of fit criterium was fulfilled by 75% (24/32) of the transients measured in the whole-cell  
290 configuration compared to 92% (67/73) of the transient measured in the perforated  
291 configuration (Fig. 7D; using an exact test, based on the hypergeometric distribution, the  
292 probability that these two samples arise from the same underlying distribution is found to be  
293 smaller than 0.02). We then used the data sets with at least three ‘good’ transients to perform  
294 the linear regression ( $\tau_{\text{transient}} - \kappa_B$  relation) and found that 15/15 (100 %) data sets with  
295 perforated recordings lead to an acceptable regression but only 2/6 (33 %) of those with  
296 whole-cell recordings (Fig. 7G). Thus, while experiments in the whole-cell configuration can  
297 yield results comparable to  $\beta$ -escin experiments (Fig. 8A [*right panel*];  $\kappa_s$ :  $19.9 \pm 25.1$ ,  $\tau_{\text{endo}}$ :  
298  $0.4 \pm 0.5$  s,  $\gamma$ :  $55.2 \pm 10.4$  s<sup>-1</sup>), it is evident that in many cases the whole-cell results were  
299 implausible (Fig. 8A, *middle and left panel*). In these cases, the linear regression fit of the  
300 data intercepts the x-axis at positive value leading to a negative Ca<sup>2+</sup> binding ratio  $\kappa_s$  and a  
301 negative endogenous decay time constant  $\tau_{\text{endo}}$ , respectively (see (Delvendahl et al., 2015))( $\kappa_s$ :  
302  $-72.9 \pm 14.3$ ,  $\tau_{\text{endo}}$ :  $-17.9 \pm 2.7$  s,  $\gamma$ :  $4.0 \pm 0.5$  s<sup>-1</sup>, *middle panel*;  $\kappa_s$ :  $-3.1 \pm 10.3$ ,  $\tau_{\text{endo}}$ :  $-0.04 \pm$   
303  $0.2$  s,  $\gamma$ :  $58.0 \pm 4.4$  s<sup>-1</sup>, *left panel*). It is important to note that the implausibility of the results  
304 from individual cells can be masked if pooled data sets from multiple neurons are analyzed  
305 (Fig. 8C and D).

306 In summary, the overall quality of the data obtained in  $\beta$ -escin perforated patch clamp  
307 experiments is tremendously improved compared to experiments in the whole-cell

308 configuration. This improvement results from two factors. The perforated configuration  
309 preserves the general integrity and functionality of the cytoplasmic pathways, including the  
310  $\text{Ca}^{2+}$  handling machinery. In addition, it optimizes the measurements directly by preventing an  
311 uncontrolled change in mobile  $\text{Ca}^{2+}$  buffer during the recording. Ultimately, this resulted in a  
312 far more reliable and better-defined estimation of the  $\text{Ca}^{2+}$  handling properties of single  
313 neurons.  
314

## 315 **Discussion**

316 Using  $\beta$ -escin as a perforating agent, we showed that it is possible to combine  
317 longlasting perforated-patch recordings with controlled  $\text{Ca}^{2+}$  indicator loading and the ‘added  
318 buffer approach’ to analyze neuronal  $\text{Ca}^{2+}$  handling properties. We consider this a substantial  
319 progress, and of particular importance for the analysis of intracellular  $\text{Ca}^{2+}$  handling since the  
320 perforated-patch clamp configuration allows stable recordings with minimized impact on the  
321 intracellular signaling system, including mobile components of the  $\text{Ca}^{2+}$  handling machinery,  
322 i.e., mobile  $\text{Ca}^{2+}$  buffers.  $\beta$ -escin perforated recordings performed similarly well as  
323 amphotericin B, gramicidin, or nystatin perforated patch recordings, which are the ‘gold  
324 standards’ for stable long-term recordings (Horn and Marty, 1988; Husch et al., 2011; Rae et  
325 al., 1991).  $\beta$ -escin perforated patch recordings clearly outperformed conventional whole-cell  
326 recordings, which becomes especially apparent by monitoring the  $\text{Ca}^{2+}$  levels. In contrast to  
327 the whole-cell configuration, the resting  $\text{Ca}^{2+}$  concentration remained stable, indicating  
328 healthy recording conditions.

329 Typically, the ‘added buffer’ approach has been used in combination with conventional  
330 whole-cell patch clamp recordings, which allows the controlled loading of cells with  $\text{Ca}^{2+}$   
331 indicator dyes (e.g., fura-2) via the patch pipette (Delvendahl et al., 2015; Lee et al., 2000a;  
332 Lin et al., 2017; Neher and Augustine, 1992). In this context, the whole-cell configuration has  
333 the obvious advantage that it allows for easy and reliable loading of the cell with  $\text{Ca}^{2+}$   
334 indicators. However, this advantage is offset by the disadvantage that intracellular  
335 components are being washed out, leading to a gradual change of cellular properties over  
336 time. This causes not only general damaging effects on the physiology and  $\text{Ca}^{2+}$  handling  
337 machinery of the cell, but it also introduces a systematic error to the analysis, since in the  
338 whole-cell configuration endogenous mobile  $\text{Ca}^{2+}$  buffer is leaving the neuron at an unknown  
339 rate during loading of the ‘added’ buffer (here fura-2). Although this is not a new finding,  
340 since Neher and Augustine had already explicitly mentioned this matter in their original paper

341 (Neher and Augustine, 1992), and although many studies have applied the added buffer  
342 approach in combination with whole-cell patch clamp recordings, this issue has not been  
343 addressed directly. In a strict sense, the added buffer approach in combination with the whole-  
344 cell configuration can only be used to analyze the immobile fraction of  $\text{Ca}^{2+}$  buffers and only  
345 if the measurements start *after* the mobile  $\text{Ca}^{2+}$  buffers have diffused out of the cell and do not  
346 interfere with the analysis. Accordingly, this approach can be explicitly used to analyze the  
347 immobile  $\text{Ca}^{2+}$  buffers as convincingly shown by Müller et al. (2005) and Matthews et al.  
348 (2013) in hippocampal neurons.

349       Employing  $\beta$ -escin as perforating agent addressed this issue and allowed to successfully  
350 combine perforated patch clamp recordings with controlled  $\text{Ca}^{2+}$  indicator loading, and thus  
351 the added buffer approach. While our and other's whole-cell experiments (Delvendahl et al.,  
352 2015; Matthews et al., 2013; Müller et al., 2005) showed that molecules with a molecular  
353 weight comparable to  $\text{Ca}^{2+}$  binding proteins started being washed out immediately after  
354 establishing the whole-cell configuration, our permeability measurements showed that the  $\beta$ -  
355 escin perforated membranes retained TRD-40kDa in the recording pipette and calbindin D-  
356 28k in the neuron, indicating that the perforated membrane is impermeable for the relative  
357 large endogenous mobile  $\text{Ca}^{2+}$  buffers. Fura-2, on the other hand, with its low molecular  
358 weight, could easily permeate through the perforated membrane.

359       For practical purposes, it is important to note that the permeability of the perforated  
360 membrane is concentration-dependent. Thus, the  $\beta$ -escin concentration might have to be  
361 adjusted to different experimental conditions and cell types. Here, with  $\beta$ -escin concentrations  
362 of 10–15  $\mu\text{M}$ , the perforated membrane was permeable to fura-2 but not to TRD-40kDa and  
363 calbindin D-28k. In permeabilized muscle cells,  $\beta$ -escin concentrations of 50 – 100  $\mu\text{M}$  render  
364 cell membranes permeable to molecules ranging from 10 to 150 kDa MW (Iizuka et al., 1997,  
365 1994; Konishi and Watanabe, 1995). In recordings of cardiac myocytes with 50  $\mu\text{M}$   $\beta$ -escin,  
366 the membrane was permeable for fluorescent markers with a MW up to 10 kDa after 20 – 25

367 min recording time (Fan and Palade, 1998).

368       Taken together, this study shows that the newly established approach is suitable to  
369 improve the quantitative analysis of intracellular  $\text{Ca}^{2+}$  handling parameters markedly. The  
370 combination of perforated patch clamp recordings, which preserve the integrity and  
371 functionality of the intracellular milieu, with the ‘added buffer approach’, is a powerful tool to  
372 analyze mobile and immobile components of the intracellular  $\text{Ca}^{2+}$  handling machinery.

373



374 **Materials and Methods**

375 *Animals and brain slice preparation*

376 All animal procedures were conducted in compliance with protocols that were approved  
377 by local government authorities (LANUV NRW, Recklinghausen, Germany). Mice were  
378 housed at 22 – 24 °C with a 12-hour light/12 hour dark cycle. Animals had access to water and  
379 chow *ad libitum*. Experiments were performed on brain slices from 9 – 11 weeks old male  
380 C57BL/6 mice. Preparation of brain slices, recordings from DA SN and Purkinje neurons,  
381 labeling, and identification of neurons was performed as previously described (Hess et al.,  
382 2013; Könnner et al., 2011; Murru et al., 2019). The mice were lightly anesthetized with  
383 isoflurane (B506; AbbVie Deutschland GmbH & Co KG, Ludwigshafen, Germany) and  
384 subsequently decapitated. Coronal slices (250 – 300 µm) containing the SN or sagittal slices  
385 containing the cerebellum (300 µm) were cut with a vibration microtome (HM-650 V;  
386 Thermo Scientific, Walldorf, Germany) under cold (4°C), carbogenated (95% O<sub>2</sub> and 5%  
387 CO<sub>2</sub>), glycerol-based modified artificial cerebrospinal fluid (GaCSF; (Ye et al., 2006)).  
388 GaCSF contained (in mM): 250 Glycerol, 2.5 KCl, 2 MgCl<sub>2</sub>, 2 CaCl<sub>2</sub>, 1.2 NaH<sub>2</sub>PO<sub>4</sub>, 10  
389 HEPES, 21 NaHCO<sub>3</sub>, 5 Glucose, adjusted to pH 7.2 with NaOH. Brain slices were transferred  
390 into carbogenated artificial cerebrospinal fluid (aCSF). aCSF contained (in mM): 125 NaCl,  
391 2.5 KCl, 2 MgCl<sub>2</sub>, 2 CaCl<sub>2</sub>, 1.2 NaH<sub>2</sub>PO<sub>4</sub>, 21 NaHCO<sub>3</sub>, 10 HEPES, 5 glucose, adjusted to pH  
392 7.2 with NaOH. First, they were kept for 20 min in a 35°C 'recovery bath' and then stored at  
393 room temperature (~24°C) for at least 30 min prior to recording. During the recordings, the  
394 slices were continuously superfused with carbogenated aCSF. To block synaptic currents,  
395 aCSF contained 10<sup>-4</sup> M PTX, 5 x 10<sup>-5</sup> M D-AP<sub>5</sub>, and 10<sup>-5</sup> M CNQX. All recordings were  
396 carried out at 24°C.

397

398 *Electrophysiological recordings*

399 DA SN neurons and the cerebellar Purkinje cells were recorded using whole-cell and  
400 perforated patch clamp recordings. Neurons were visualized and imaged with a fixed stage  
401 upright microscope (BX51WI, Olympus, Hamburg, Germany) using a 20× water-immersion  
402 objective (XLUMPLFL, 0.95 numerical aperture, 2 mm working distance, Olympus) with a  
403 4× magnification changer (U-TVAC, Olympus), infrared differential interference contrast  
404 optics (Dodt and Zieglgänsberger, 1990) and fluorescence optics. Neurons were pre-identified  
405 by the size and location of their somata. This pre-identification was verified in each case by a  
406 physiological characterization during the recording and *post hoc* by immunohistochemistry  
407 for cell type-specific markers. DA SN neurons were recorded in the ventral tier SN. They  
408 have a low frequency, regular firing patterns with broad action potentials, and generate a clear  
409  $I_h$ -dependent “sag”-potential upon hyperpolarization (Fig. 1) (Lacey et al., 1989; Richards et  
410 al., 1997; Ungless et al., 2001). Purkinje cells were identified by their distinct morphology  
411 and localization within the cerebellar cortex and by their high-frequency spontaneous firing  
412 and very narrow action potentials (~200  $\mu$ s; Supplement Fig. 1A) (Bean, 2007; McKay and  
413 Turner, 2005, 2004)). During the experiments, biocytin (0.1%; B4261; Sigma) diffused  
414 through the broken or perforated membrane into the recorded cell. Post recording, the identity  
415 of DA SN neurons and cerebellar Purkinje cells was confirmed by their immunoreactivity for  
416 the dopamine transporter (Fig. 1) (Ciliax et al., 1995) or the calcium-binding protein calbindin  
417 D-28k (Supplement Fig. 1) (Abe et al., 1992; Fournet et al., 1986), respectively. Biocytin-  
418 streptavidin labeling combined with dopamine transporter or calbindin D-28k  
419 immunohistochemistry was performed as previously described (Hess et al., 2013; Murru et  
420 al., 2019).

421

#### 422 *Whole-cell patch and perforated patch-clamp recordings*

423 Electrodes with tip resistances between 3 and 5 M $\Omega$  were fashioned from borosilicate

424 glass (0.86 mm inner diameter; 1.5 mm outer diameter; GB150-8P; Science Products,  
425 Hofheim, Germany) with a vertical pipette puller (PP-830; Narishige, London, UK).  
426 Recordings were performed with an EPC10 patch-clamp amplifier (HEKA, Lambrecht,  
427 Germany) controlled by the program PatchMaster (version 2.32; HEKA) running under  
428 Windows. Data were sampled at 10 kHz and low-pass filtered at 2 kHz with a four-pole  
429 Bessel filter. The calculated liquid junction potential between intracellular and extracellular  
430 solution was also compensated (14.6 mV for normal aCSF, calculated with Patcher's Power  
431 Tools plug-in from <http://www.mpibpc.mpg.de/groups/neher/index.php?page=software> for  
432 IGOR Pro 6 [Wavemetrics, Lake Oswego, OR, USA]).

433 Whole-cell recordings were performed with pipette solution containing (in mM): 141 K-  
434 gluconate, 10 KCl, 10 HEPES, 0.1 EGTA, 2 MgCl<sub>2</sub>, 3 K-ATP, 0.3 Na-ATP and adjusted to pH  
435 7.2 with KOH. For perforated patch clamp recordings and Ca<sup>2+</sup> imaging, ATP and GTP were  
436 omitted from the pipette solution since ATP might distort the measurement of Ca<sup>2+</sup> handling  
437 properties (Matthews et al., 2013) and to prevent uncontrolled permeabilization of the cell  
438 membrane during perforated patch clamp recordings (Lindau and Fernandez, 1986). For Ca<sup>2+</sup>  
439 imaging, EGTA was replaced by 100 or 200 μM fura-2 (pentapotassium salt, F1200,  
440 Molecular Probes, OR, USA).

441 Perforated patch recordings were performed using protocols modified from Fan and  
442 Palade (Fan and Palade, 1998) and Sarantopoulos (Sarantopoulos et al., 2004). The patch  
443 pipette was tip filled with internal solution and backfilled with β-escin (~30 - 60 μg·ml<sup>-1</sup>;  
444 E1378; Sigma) or amphotericin B (~200 μg·ml<sup>-1</sup>; A4888, Sigma) containing internal solution  
445 to achieve perforated patch recordings. β-escin was prepared as a stock solution (25 mM in  
446 internal solution) and stored up to 1 week at -20°C protected from light. Shortly before the  
447 experiments, the stock solution was diluted in intracellular saline to a final concentration.  
448 Amphotericin B was dissolved in dimethyl sulfoxide (DMSO; final concentration 0.4 – 0.5%;  
449 D8418, Sigma) as described previously (Hess et al., 2013; Kyrozis and Reichling, 1995; Rae

450 et al., 1991) and added to the modified pipette solution shortly before use. The amphotericin  
451 B solution was freshly prepared every day. Ionophore containing solutions were stored on ice  
452 and replaced every 4 hours as needed. After obtaining a  $G\Omega$  seal, the perforation process was  
453 monitored by continually measuring the access resistance ( $R_a$ ). Experiments were started after  
454  $R_a$  had reached steady-state, and the action potential amplitude was stable (20 – 30 min). A  
455 rupture of the membrane and the resulting conversion to the whole-cell configuration was  
456 indicated by abrupt changes in  $R_a$  or action potential amplitude. Such experiments were  
457 rejected.

458

#### 459 *Imaging set up for fluorometric measurements*

460 The imaging setup for fluorometric measurements consisted of an Imago/SensiCam  
461 CCD camera with a 640x480 chip (Till Photonics, Gräfelfing, Germany) and a Polychromator  
462 IV (Till Photonics) that was coupled *via* an optical fiber into the upright microscope  
463 (microscope details are provided above). The camera and the polychromator were controlled  
464 by the software Vision (version 4.0, Till Photonics) running under Windows. The excitation  
465 light from the polychromator was reflected onto the cells with a dichroic mirror, and emitted  
466 fluorescence was detected through an emission filter. The specific filter and mirror settings for  
467 the different experiments are given below. Data were acquired as 80x60 frames using 8x8 on-  
468 chip binning. Images were recorded in arbitrary units (AU) and stored and analyzed as 12-bit  
469 grayscale images. For analyzing the fluorescence dynamics, the mean AU values of regions of  
470 interest (ROIs) from the middle of the cell bodies were used. 'Background subtraction' for the  
471 time series was performed with equivalent time series of neighboring ROIs.

472

#### 473 *Rhodamine-Dextran loading.*

474 Loading experiments with fluorescent tetramethylrhodamine-dextran (TRD-40kDa,  
475 MW 40 kDa, D1842, Life Technologies) were performed in the standard whole-cell or the

476 perforated patch configuration. The neurons were loaded with TRD-40kDa *via* the patch  
477 pipette (0.08%) and excited at 557 nm (bandpass: 562 nm, 562/40 BrightLine HC, Art-no.  
478 F39-562, AHF Analysentechnik AG, Tübingen, Germany; beamsplitter: 593 nm, HC BS 593,  
479 Art-no. F38-593, AHF). Emission was detected through a 593 nm long-pass filter (593/LP  
480 BrightLine HC, Art-no. F37-594, AHF). TRD-40kDa -fluorescence is reported as  $F/F_0$ , where  
481  $F$  is the measured fluorescence, and  $F_0$  is the averaged fluorescence of 5 consecutive images  
482 in on-cell mode (before break-in or perforation of the cell membrane). Frames were taken in  
483 intervals of 30 s.

484

#### 485 *Fluorimetric $Ca^{2+}$ measurements with fura-2*

486 Intracellular  $Ca^{2+}$  concentrations were measured with the  $Ca^{2+}$  indicator fura-2, a  
487 ratiometric dye suitable for absolute  $Ca^{2+}$  concentration determination once calibrated  
488 (Grynkiewicz et al., 1985; Poenie, 1990). DA SN neurons were loaded with fura-2  
489 (pentapotassium salt, F1200, Molecular Probes) *via* the patch pipette (100 or 200  $\mu$ M). Fura-2  
490 was excited at 340 nm, 360 nm, or 380 nm (410 nm dichroic mirror; DCLP410, Chroma,  
491 Rockingham, VT, USA). Emitted fluorescence was detected through a 440 nm long-pass filter  
492 (LP440).

493

#### 494 *Calibration and 'added buffer approach'*

495 The free intracellular  $Ca^{2+}$  concentrations were determined as described by  
496 (Grynkiewicz et al., 1985), and the added buffer approach to analyze intracellular  $Ca^{2+}$   
497 handling properties was performed as previously described (Neher and Augustine, 1992;  
498 Paeger et al., 2017; Pippow et al., 2009). For completeness and notation clarification, these  
499 methods are described in detail in the *Appendix*. In brief: The added buffer approach was used  
500 in combination with whole-cell and perforated patch clamp recordings and optical  $Ca^{2+}$   
501 imaging. The added buffer approach is based on a single-compartment model with the

502 rationale that for measurements of intracellular  $\text{Ca}^{2+}$  concentrations with  $\text{Ca}^{2+}$  chelator-based  
503 indicators, the amplitude and time course of the signals depends on the concentration of the  
504  $\text{Ca}^{2+}$  indicator (here fura-2). The indicator acts as an exogenous  $\text{Ca}^{2+}$  buffer and competes  
505 with the endogenous  $\text{Ca}^{2+}$  buffer(s).

506 The kinetics of cytosolic  $\text{Ca}^{2+}$  signals strongly rely on the endogenous and exogenous  
507 (added)  $\text{Ca}^{2+}$  buffers of the cell. The amplitude and decay rate of the free intracellular  $\text{Ca}^{2+}$   
508 change with increasing exogenous buffer concentration: The amplitude of free  $\text{Ca}^{2+}$  decreases,  
509 and the time constant  $\tau_{\text{transient}}$  of the decay increases. If the buffer capacity of the added buffer  
510 is known, the time constant of decay ( $\tau_{\text{transient}}$ ) can be used to estimate, by extrapolation, the  
511  $\text{Ca}^{2+}$  signal to conditions, with only endogenous buffers present ( $-\kappa_{\text{B}} = 1 + \kappa_{\text{S}}$ ). The model  
512 used for this study (Eq. 4) assumes that the decay time constants  $\tau_{\text{transient}}$  are a linear function  
513 of the  $\text{Ca}^{2+}$  binding ratios ( $\kappa_{\text{B}}$  and  $\kappa_{\text{S}}$ ).  $\kappa_{\text{S}}$  is determined from the negative x-axis intercept of  
514 this plot. The slope of the fit is the inverse of the linear extrusion rate ( $\gamma$ ). The point of  
515 intersection of the linear fit with the y-axis denotes the endogenous decay time constant  $\tau_{\text{endo}}$   
516 (no exogenous  $\text{Ca}^{2+}$  buffer in the cell). A detailed description of how to estimate the variance  
517 of these parameters is provided in the *Appendix*.

518

### 519 *Tools for data analysis and statistics*

520 Data analysis was performed with Igor Pro 6 (Wavemetrics), Spike2 (CED,  
521 Cambridge, UK), R (R Development Core Team [2009], <http://www.R-project.org>) and  
522 Graphpad Prism (version 8; Graphpad Software Inc., La Jolla, CA, USA). All calculations for  
523 the determination of EGTA purity, its dissociation constant, and the free  $\text{Ca}^{2+}$  concentrations  
524 in the calibration solutions were performed in R. If not stated otherwise, all calculated values  
525 are expressed as means  $\pm$  SEM (standard error of the mean). Box plots were constructed as  
526 follows: The '+' signs show the mean, the horizontal line the median of the data. Whiskers

527 indicate the minimum and maximum values of the data. For pairwise comparisons of  
528 dependent and independent normal distributions, paired and unpaired t-tests were used,  
529 respectively. For pairwise comparisons of independent, not normal distributions, Mann-  
530 Whitney U-tests were used. For multiple comparisons, ANOVA was performed; post hoc  
531 pairwise comparisons were performed using t-tests as indicated in the figures. For comparison  
532 of the resting  $\text{Ca}^{2+}$  levels ( $[\text{Ca}^{2+}]_i$ ) over time under whole-cell and  $\beta$ -escin perforated-patch  
533 clamp conditions, the regression slope, after linear fitting, was also used. Tests were executed  
534 using GraphPad Prism 8 (GraphPad Software Inc., La Jolla, CA, USA). A significance level  
535 of 0.05 was accepted for all tests. Significance levels were: \*  $p < 0.05$ , \*\*  $p < 0.01$ , \*\*\*  $p <$   
536  $0.001$ . In all figures, n-values are given in brackets. Exact p-values are reported if  $p > 0.0001$ .  
537 Scaling, contrast enhancement, and z-projections of images were performed with ImageJ  
538 v2.0.0. The final figures were prepared with Affinity Designer (Ver. 1.6.1, Serif Ltd).

539

## 540 APPENDIX

### 541 *Measurement of free intracellular $\text{Ca}^{2+}$ concentration*

542 The free intracellular  $\text{Ca}^{2+}$  concentrations were determined as in (Grynkiewicz et al.,  
543 1985):

$$[\text{Ca}^{2+}]_i = K_{d,\text{Fura}} \frac{F_{380,\text{min}} (R - R_{\text{min}})}{F_{380,\text{max}} (R_{\text{max}} - R)} \quad (1)$$

544  $[\text{Ca}^{2+}]_i$  is the free intracellular  $\text{Ca}^{2+}$  concentration for the background-subtracted fluorescence  
545 ratio  $R$  from 340 nm and 380 nm excitation.  $R_{\text{min}}$  and  $R_{\text{max}}$  are the ratios at a  $\text{Ca}^{2+}$   
546 concentration at virtually 0 M (i.e., ideally, no fura-2 molecules are bound to  $\text{Ca}^{2+}$ ) and at  
547 saturating  $\text{Ca}^{2+}$  concentrations (i.e., ideally, all fura-2 molecules are saturated with  $\text{Ca}^{2+}$ ),  
548 respectively.  $K_{d,\text{Fura}}$  is the dissociation constant of fura-2.  $F_{380,\text{min}}/F_{380,\text{max}}$  is the ratio  
549 between the emitted fluorescence of  $\text{Ca}^{2+}$  free dye and the emitted fluorescence of  $\text{Ca}^{2+}$   
550 saturated dye at 380 nm excitation, reflecting the dynamic range of the indicator.

551 The term  $K_{d,Fura}$  ( $F_{380,min}/F_{380,max}$ ) in Eq. (1) is dependent on the dye concentration and is  
552 substituted with the effective dissociation constant  $K_{d,Fura,eff}$ , which is independent of the dye  
553 concentration and specific for each experimental setup (Neher, 1989):

$$K_{d,Fura,eff} = [Ca^{2+}]_i \frac{(R_{max} - R)}{(R - R_{min})} \quad (2)$$

554 We used *in vitro* calibration (in solution). For calibration  $K_{d,Fura,eff}$  was determined by  
555 measuring fura-2 fluorescence ratios for  $R_{max}$ ,  $R_{min}$ , and  $R = R_{def}$ .  $R_{def}$  is the ratio for a defined  
556  $[Ca^{2+}]_i$ , which was set to 0.35  $\mu$ M (see below for the preparation of the solutions).  $K_{d,Fura,eff}$   
557 was then calculated from Eq. (2). To account for environmental differences between the  
558 cytoplasmic milieu and *in vitro* conditions, we used a correction factor ( $P$ ) for  $R_{max}$  and  $R_{min}$ ,  
559 as suggested by (Grynkiewicz et al., 1985), see also (Pippow et al., 2009):

$$K_{d,Fura,eff} = [Ca^{2+}]_i \frac{(R_{max} P - R)}{(R - R_{min} P)} \quad (3)$$

560  $P$  was determined as described by (Poenie, 1990; Zhou and Neher, 1993). First, the  
561 fluorescence (peak) deflection at 340 nm was divided by that at 380 nm excitation from  
562 voltage-induced intracellular calcium transients ( $R_{d,cell}$ ). Second, the ratio ( $R_{d,vitro}$ ) from pairs  
563 of calibration solutions was determined by dividing  $(F_{340,max} - F_{340,min})/(F_{380,min} - F_{380,max})$ .  
564 The correction factor  $P$  is the fraction of  $R_{d,cell}/R_{d,vitro}$ .

565 The fluorescence ratio  $R$  of an intracellular transient can then be converted to  $[Ca^{2+}]_i$   
566 using:

$$[Ca^{2+}]_i = K_{d,Fura,eff} \frac{(R - R_{min} P)}{(R_{max} P - R)} \quad (4)$$

567 To determine the endogenous  $Ca^{2+}$  binding ratio, the dissociation constant ( $K_{d,Fura}$ ) has to be  
568 known. To formulate a relationship between  $K_{d,Fura}$  and  $K_{d,Fura,eff}$  that is independent of the dye  
569 concentration, an isocoefficient  $\alpha$  was introduced by (Zhou and Neher, 1993):



$$K_{d,\text{Fura}} = K_{d,\text{Fura,eff}} \frac{(R_{\min} + \alpha)}{(R_{\max} + \alpha)} \quad (5)$$

570  $\alpha$  is the isocoefficient, for which the sum

$$F_i(t) = F_{340}(t) + \alpha F_{380}(t) \quad (6)$$

571 is independent of  $\text{Ca}^{2+}$  concentration.  $F_{340}$  and  $F_{380}$  are the background-subtracted  
572 fluorescence signals measured during a brief  $\text{Ca}^{2+}$  transient. Once the isocoefficient has been  
573 determined,  $K_{d,\text{Fura}}$  can be calculated from Eq. (5).

574 Calibration solutions: The free  $\text{Ca}^{2+}$  concentrations of the calibration solutions were  
575 adjusted by using appropriate proportions of  $\text{Ca}^{2+}$  and the  $\text{Ca}^{2+}$  chelator EGTA. The ability of  
576 EGTA to bind calcium is highly dependent on the environmental conditions such as ionic  
577 strength, temperature, pH, and the concentrations of other metals that compete for binding  
578 (Harrison and Bers, 1989, 1987). In theory, the necessary amount of  $\text{Ca}^{2+}$  and EGTA to set the  
579 free  $\text{Ca}^{2+}$  concentration for the experimental conditions can be computed (Patton et al., 2004).  
580 However, small variations in the parameters such as pH, temperature, impurities of chemicals,  
581 pipetting, or weighing errors can lead to considerable errors in the estimate of the free  $\text{Ca}^{2+}$  in  
582 EGTA-buffered  $\text{Ca}^{2+}$  solutions with computer programs (McGuigan et al., 2007). To account  
583 for such variations, we determined the free  $\text{Ca}^{2+}$  concentrations in our calibration solutions by  
584 using a  $\text{Ca}^{2+}$  selective electrode following the guide from McGuigan (McGuigan et al., 1991)  
585 and Pippow (Pippow et al., 2009) as described in the supplemental. Calibration solutions were  
586 prepared as follows (in mM):  $R_{\max}$ : 140 KCl, 2.5 KOH, 15 NaCl, 1  $\text{MgCl}_2$ , 5 HEPES, 10  
587  $\text{CaCl}_2$  and 0.05 fura-2;  $R_{\min}$ : 129.5 KCl, 13 KOH, 15 NaCl, 1  $\text{MgCl}_2$ , 5 HEPES, 8 EGTA and  
588 0.05 fura-2;  $R_{\text{def}}$ : 129.5 KCl, 13 KOH, 10.3 NaCl, 4.7 NaOH, 1  $\text{MgCl}_2$ , 5 HEPES, 4 EGTA,  
589 2.7  $\text{CaCl}_2$  and 0.05 fura-2, yielding a free  $\text{Ca}^{2+}$  concentration of 0.35  $\mu\text{M}$ . All solutions were  
590 adjusted to pH 7.2 with HCl.

591 The concentrations of free  $\text{Ca}^{2+}$  were determined from the ratioed imaging signals  
592 applying the approach from Grynkiewicz et al. (Grynkiewicz et al., 1985) (Eq. (2)). The

593 calibration was performed *in vitro* (in solution). For calibration, a drop of each calibration  
594 solution (200  $\mu$ l,  $R_{\min}$ : no  $\text{Ca}^{2+}$ ,  $R_{\text{def}}$ : 0.35  $\mu$ M  $\text{Ca}^{2+}$ ,  $R_{\max}$ : 10 mM  $\text{Ca}^{2+}$ ) was placed on a  
595 sylgard coated recording chamber. Ratio images (from 340 nm and 380 nm excitation) were  
596 acquired for each solution. The acquired values were: correction factor (Poenie, 1990)  $P =$   
597  $0.78 \pm 0.03$ , resulting in:  $R_{\max} = 1.267 \pm 0.055$  ( $n = 9$ );  $R_{\min} = 0.116 \pm 0.004$  ( $n = 9$ );  $R_{\text{def}} =$   
598  $0.277 \pm 0.004$  ( $n = 7$ );  $K_{\text{d,Fura,eff}} = 1.048 \pm 0.052$   $\mu$ M and isocoefficient  $\alpha = 0.192 \pm 0.003$ .  
599 According to Eq. (5) the  $K_{\text{d}}$  for fura-2 was  $K_{\text{d,Fura}} = 0.222 \pm 0.082$   $\mu$ M.

600

### 601 *Single compartment model of calcium buffering: the 'added buffer approach'*

602 For measurements of intracellular  $\text{Ca}^{2+}$  concentrations with  $\text{Ca}^{2+}$  chelator-based  
603 indicators, the amplitude and time course of the signals are dependent on the concentration of  
604 the  $\text{Ca}^{2+}$  indicator (in this case, fura-2) that acts as an exogenous (added)  $\text{Ca}^{2+}$  buffer and  
605 competes with the endogenous buffers (Helmchen et al., 1997; Helmchen and Tank, 2015;  
606 Neher and Augustine, 1992; Tank et al., 1995). With the 'added buffer approach' (Neher and  
607 Augustine, 1992), the capacity of the endogenous  $\text{Ca}^{2+}$  buffer in a cell is determined by  
608 measuring the decay of the  $\text{Ca}^{2+}$  signal at different concentrations of 'added buffer' and by  
609 extrapolating to conditions in which only the endogenous buffer is present. Strictly speaking,  
610 the added buffer approach in combination with the whole-cell configuration can only be used  
611 to analyze the immobile fraction of  $\text{Ca}^{2+}$  buffers and only when the measurements start after  
612 the mobile  $\text{Ca}^{2+}$  buffers have diffused out of the cell and do not interfere with the analysis. In  
613 contrast,  $\beta$ -escin perforated recordings can be used to measure the total endogenous  $\text{Ca}^{2+}$   
614 buffer capacity. The added buffer approach is based on a single-compartment model assuming  
615 that a big patch-pipette with a known (clamped) concentration of a  $\text{Ca}^{2+}$  indicator (fura-2) is  
616 connected to a spherical cell. The model assumes that the cell contains an endogenous  $\text{Ca}^{2+}$   
617 buffer ( $S$ ), of which the total concentration, dissociation constant  $K_{\text{d,S}}$ , and its on ( $k^+$ ) and off  
618 ( $k^-$ ) rates are unknown. When the cell membrane is perforated by  $\beta$ -escin, fura-2 (in its bound

619 and unbound forms) starts to diffuse into the cell, which is considered small enough to be  
620 always in a 'well mixed' state (i.e., there are no gradients of chemical species within the cell  
621 body). In this model three cellular parameters determine the cytosolic  $\text{Ca}^{2+}$  dynamics: (1)  $\text{Ca}^{2+}$   
622 sources, (2)  $\text{Ca}^{2+}$  binding ratio and (3)  $\text{Ca}^{2+}$  extrusion.

623  $\text{Ca}^{2+}$  sources: In the model, two forms of  $\text{Ca}^{2+}$  sources are defined: (1) the  $\text{Ca}^{2+}$  influx  
624 from the pipette ( $j_{\text{in,pipette}}$ ) and (2) the  $\text{Ca}^{2+}$  entering the cell *via* voltage-activated channels  
625 from a brief  $\text{Ca}^{2+}$  pulse, which can be described by a delta function ( $j_{\text{in,stim}}$ ) (Helmchen and  
626 Tank, 2015; Neher and Augustine, 1992):

$$j_{\text{in,pipette}} = ([\text{BCa}_p] - [\text{BCa}]) \frac{D_B \rho}{R_p} \quad (7)$$

$$j_{\text{in,stim}} = n_{\text{Ca}} \delta(t - t_{\text{stim}}) = \frac{Q_{\text{Ca}}}{2F} \delta(t - t_{\text{stim}}) \quad (8)$$

627  $[\text{BCa}]$  is the concentration of the exogenous buffer (fura-2) in its  $\text{Ca}^{2+}$  bound form (the  
628 subscript p is for quantities within the pipette),  $D_B$  is the diffusion coefficient of the  
629 exogenous buffer,  $\rho$  is the specific resistance of the pipette filling solution,  $R_p$  is the pipette  
630 resistance,  $n_{\text{Ca}}$  is the  $\text{Ca}^{2+}$  influx induced by the stimulus,  $\delta(t - t_{\text{stim}})$  is the delta function with  
631  $t_{\text{stim}}$  as the time of stimulus,  $Q_{\text{Ca}}$  is the  $\text{Ca}^{2+}$  charge influx, and  $F$  is the Faraday's constant.

632  $\text{Ca}^{2+}$  binding ratio: In the cell,  $\text{Ca}^{2+}$  is bound to the  $\text{Ca}^{2+}$  buffers fura-2 and to the  
633 endogenous buffers, which are both assumed to be always in equilibrium with free  $\text{Ca}^{2+}$  and  
634 not saturated. The ability of the experimentally introduced exogenous buffer to bind  $\text{Ca}^{2+}$  is  
635 described by its  $\text{Ca}^{2+}$  binding ratio that is defined as the ratio of the change in buffer-bound  
636  $\text{Ca}^{2+}$  over the change in free  $\text{Ca}^{2+}$ :

$$\kappa_B = \frac{d[\text{BCa}]}{d[\text{Ca}^{2+}]_i} = \frac{[\text{B}_T] K_{d,B}}{([\text{Ca}^{2+}]_i + K_{d,B})^2} \quad (9)$$

637  $[\text{B}_T]$  is the total concentration of the exogenous buffer  $B$  and  $K_{d,B}$  is its dissociation constant  
638 for  $\text{Ca}^{2+}$ . An analogous expression exists for the  $\text{Ca}^{2+}$  binding ratio of the endogenous buffer  $S$   
639 ( $\kappa_S$ ).

640  $\text{Ca}^{2+}$  Extrusion: the model assumes a linear extrusion mechanism for  $\text{Ca}^{2+}$  (Neher and  
 641 Augustine, 1992):

642

$$j_{\text{out}} = \gamma \Delta[\text{Ca}^{2+}]_i = \gamma([\text{Ca}^{2+}]_i - [\text{Ca}^{2+}]_{i,\infty}) \quad (10)$$

643  $[\text{Ca}^{2+}]_{i,\infty}$  is the steady-state intracellular  $\text{Ca}^{2+}$  concentration  $[\text{Ca}^{2+}]_i$ , to which a transient  
 644 decays. According to Neher and Augustine (Neher and Augustine, 1992),  $\gamma$  'reflects the  
 645 combined action of pumps, exchange carriers, and membrane conductances and has the  
 646 dimension  $\text{l s}^{-1}$ . In the following, we refer to it as  $\tilde{\gamma}$ . In more recent publications  $\gamma$  is defined as  
 647 the extrusion rate for  $\text{Ca}^{2+}$  measured in  $\text{s}^{-1}$  (Helmchen et al., 1997, 1996; Lee et al., 2000a,  
 648 2000b; Lips and Keller, 1998; Palecek et al., 1999; Sabatini et al., 2002; Vanselow and Keller,  
 649 2000). Accordingly, we use (Jackson and Redman, 2003):

$$\gamma = \frac{\tilde{\gamma}}{V} \quad (11)$$

650 where  $V$  is the volume of the cell.

651 Dynamics of  $\text{Ca}^{2+}$  transients: the mechanisms described in Eqs. 9 and 10 are combined  
 652 to the model that describes the dynamics of the  $\text{Ca}^{2+}$  decay after a brief  $\text{Ca}^{2+}$  influx:

$$\frac{d[\text{Ca}^{2+}]_i}{dt} + \frac{d[\text{BCa}]}{dt} + \frac{d[\text{SCa}]}{dt} = \frac{j_{\text{in,pipette}} + j_{\text{in,stim}} - j_{\text{out}}}{V} \quad (12)$$

653 Substituting the time dependent terms for the buffers  $B$  and  $S$  with their  $\text{Ca}^{2+}$  binding ratios  $\kappa_B$   
 654 and  $\kappa_S$ , respectively,  $[\text{BCa}]$  with its equilibrium value  $[\text{BCa}] = [\text{Ca}^{2+}]_i[\text{B}_T]/(K_d + [\text{Ca}^{2+}]_i)$  and  
 655  $\tau_{\text{loading}} = (VR_p)/(D_B \tilde{n})$  we get (Neher and Augustine, 1992):

$$\frac{d[\text{Ca}^{2+}]_i}{dt} = \frac{\tau_{\text{loading}}^{-1} \cdot ([\text{BCa}]_p - \frac{[\text{Ca}^{2+}]_i[\text{B}_T]}{K_d + [\text{Ca}^{2+}]_i}) + \frac{\tilde{\gamma}}{V} ([\text{Ca}^{2+}]_{i,\infty} - [\text{Ca}^{2+}]_i) + \frac{n_{\text{Ca}} \delta(t-t_0)}{V}}{(1 + \kappa_B + \kappa_S)} \quad (13)$$

656 Neher and Augustine (Neher and Augustine, 1992) linearized Eq. (13) to simplify the solution  
 657 for this equation for the case in which the baseline for  $[\text{Ca}^{2+}]_i$  is constant, the concentration of  
 658 the exogenous buffer  $[\text{B}_T]$  is constant and does not influence the baseline  $\text{Ca}^{2+}$ , and when the

659 amplitudes of the  $\text{Ca}^{2+}$  transients are small (Neher and Augustine, 1992). Where 'small' is  
660 defined as less than  $0.5 K_{d,\text{Fura}}$ . When the  $\text{Ca}^{2+}$  pulse is short compared to the decay time  
661 constant, the delta function equals zero. Under these conditions, the decay of a voltage-  
662 induced  $\text{Ca}^{2+}$  transient can be described as:

$$\tau_{\text{transient}} = \frac{1 + \kappa_B + \kappa_S}{\gamma - \frac{(1 + \kappa_S)}{\tau_{\text{loading}}}} \quad \text{for: } \begin{array}{l} \text{baseline} = \text{const} \\ [\text{B}_T] = \text{const} \\ \text{small } \Delta[\text{Ca}^{2+}]_i \end{array} \quad (14)$$

663  $\tau_{\text{transient}}$  is proportional to  $\kappa_B$ , and a linear fit to the data has its negative x-axis intercept at  $1 +$   
664  $\kappa_S$ , yielding the endogenous  $\text{Ca}^{2+}$  binding ratio of the cell. The slope of this fit is the inverse  
665 of the  $\text{Ca}^{2+}$  extrusion rate  $\gamma$  (Eq. (11)). The y-axis intercept yields the time constant  $\tau_{\text{endo}}$  for  
666 the decay of the  $\text{Ca}^{2+}$  transient as it would appear in the cell without exogenous buffer.

667

#### 668 *Analysis of calcium buffering*

669 Dye loading was monitored at 360 nm excitation, the isosbestic point of fura-2. Frames  
670 were taken at 30 s intervals (3 ms exposure time). We estimated the intracellular fura-2  
671 concentration for different times during the loading curve, assuming that cells were fully  
672 loaded when the fluorescence reached a plateau and the fura-2 concentration in the cell and in  
673 the pipette is equal (100 or 200  $\mu\text{M}$ ) (Lee et al., 2000b).

674 During fura-2 loading, voltage-activated  $\text{Ca}^{2+}$  influx was induced by short spike trains,  
675 which were elicited by current pulses (500pA, 500ms) from a holding potential of about -70  
676 mV. To monitor the induced  $\text{Ca}^{2+}$  transients ratiometrically, pairs of images at 340 nm (12 ms  
677 exposure time) and 380 nm (4 ms exposure time) excitation were acquired at 10 Hz for ~20 s.  
678 Typically 3 – 4  $\text{Ca}^{2+}$  transients were induced during loading at different intracellular fura-2  
679 concentrations.

680

681 *Ratiometric Data Analysis*

682 **Getting the standard error of the ratiometric estimator**

683 Given measurements at two excitation wavelengths (340 and 380 nm),  $\widehat{ADU}_{340}$  and  $\widehat{ADU}_{380}$   
 684 (these are pooled photon counts over the  $P$  pixels of the ROI) and concomitant measurements  
 685  $\widehat{ADU}_{B,340}$  and  $\widehat{ADU}_{B,380}$  (pooled photon counts over the  $P_B$  pixels of the "background  
 686 region"), what we refer to as the "classical" ratiometric estimator at time  $t_i$ , is (Joucla et al.,  
 687 2010) (Eq. 8):

$$\widehat{ca}(t_i) = K_{eff} \frac{\hat{r}(t_i) - R_{min}}{R_{max} - \hat{r}(t_i)}, \quad (1)$$

688 where  $K_{eff}$ ,  $R_{min}$  and  $R_{max}$  are calibrated parameters (assumed exactly known for now) and  
 689 where (Joucla et al., 2010) (Eq. 6):

$$\hat{r}(t_i) = \frac{(T_{e,340})^{-1}(\widehat{ADU}_{340}/P - \widehat{ADU}_{B,340}/P_B)}{(T_{e,380})^{-1}(\widehat{ADU}_{380}/P - \widehat{ADU}_{B,380}/P_B)}, \quad (2)$$

690 where  $T_{e,\lambda}$  is the flash duration at wavelength  $\lambda$ . Our model for the fluorescence intensity at  
 691 each wavelength is (Joucla et al., 2010) (Eq. 2a and 2b):

$$F_{340} = \left\{ \frac{[Fura]_{total}\phi}{K_{Fura} + [Ca^{2+}]} (R_{min}K_{eff} + R_{max}[Ca^{2+}]) + s_{B,340} \right\} T_{e,340}P, \quad (3)$$

692 and

$$F_{380} = \left\{ \frac{[Fura]_{total}\phi}{K_{Fura} + [Ca^{2+}]} (K_{eff} + [Ca^{2+}]) + s_{B,380} \right\} T_{e,380}P, \quad (4)$$

693 where  $s_{B,\lambda}$  is the auto-fluorescence at wavelength  $\lambda$  –assumed homogeneous among the  $P$   
 694 pixels of the ROI–,  $K_{Fura}$  is a calibrated parameter,  $[Fura]_{total}\phi$ , is the total (bound plus  
 695 free) concentration of fura-2 in the cell multiplied by a dimensionless experiment specific  
 696 parameter,  $\phi$ , lumping together the quantum efficiency, the neurite thickness, etc.

697 Under our assumptions (Joucla et al., 2010) (Eq. 5) we have (we don't use a " $\hat{\phantom{x}}$ " here since  
 698 we are dealing with a *random variable*, not a *realization* of it):

$$ADU_{\lambda}(t_i) = GF_{\lambda}(t_i) + \epsilon G \sqrt{F_{\lambda}(t_i) + \sigma_{read-out}^2}, \quad (5)$$

699 where  $G$  is the camera gain,  $\sigma_{read-out}^2$  is its read-out variance,  $F_{\lambda}(t_i)$  is given by Eq. 3 and 4  
 700 and where  $\epsilon \sim \mathcal{N}(0,1)$  ( $\epsilon$  is a Gaussian random variable with mean 0 and variance 1). In  
 701 words:  $ADU_{\lambda}(t_i)$  has a Gaussian distribution with mean  $GF_{\lambda}(t_i)$  and variance  $G^2(F_{\lambda}(t_i) +$   
 702  $\sigma_{read-out}^2)$ .

703 To determine the variance of  $ADU_{\lambda}(t_i)$  we need to know  $F_{\lambda}(t_i)$  and for that, we need to know  
 704  $[Ca^{2+}](t_i)$  precisely what we want to estimate. But  $EADU_{\lambda}(t_i)$ , the expected value of  
 705  $ADU_{\lambda}(t_i)$ , is  $GF_{\lambda}(t_i)$  so we can use the observed value  $\widehat{ADU}_{\lambda}(t_i)$  of  $ADU_{\lambda}(t_i)$  as an estimate  
 706 for  $GF_{\lambda}(t_i)$  – in Eq. 5 we plug-in  $\widehat{ADU}_{\lambda}(t_i)$  for  $GF_{\lambda}(t_i)$  – leading to:

$$\hat{\sigma}_{ADU_{\lambda}(t_i)}^2 = G\widehat{ADU}_{\lambda}(t_i) + G^2\sigma_{read-out}^2 \approx \sigma_{ADU_{\lambda}(t_i)}^2, \quad (6)$$

707 In practice, when we are dealing with several pixels making a ROI, we must multiply the  
 708 read-out variance by the number of pixels used. With the resulting  $\hat{\sigma}_{ADU_{\lambda}(t_i)}^2$  we can work  
 709 with, to get  $\hat{\sigma}_{r(t_i)}^2$  and  $\hat{\sigma}_{\widehat{Ca}(t_i)}^2$ . We could use the propagation of uncertainty (or error  
 710 propagation) together with Eq. 2 and 1 for that, but we can also use a Monte Carlo approach:  
 711 we draw a thousand quadruple of vectors  
 712  $\left(ADU_{340}^{[j]}(t_i), ADU_{380}^{[j]}(t_i), ADU_{B,340}^{[j]}(t_i), ADU_{B,380}^{[j]}(t_i)\right)$  ( $j = 1, \dots, 1000$ ) from four  
 713 independent Gaussian distributions of the general form:

$$ADU_{\lambda}^{[j]}(t_i) = ADU_{\lambda}(t_i) + \epsilon_j \hat{\sigma}_{ADU_{\lambda}(t_i)}, \quad (7)$$

714 plug-in these quadruples into Eq. 2 giving us 1000  $r^{[j]}(t_i)$  before plugging in the latter into  
715 Eq. 1 leading to 1000  $\widehat{Ca}^{[j]}(t_i)$ . The empirical variance of these simulated observations will  
716 be used as  $\widehat{\sigma}_{\widehat{Ca}(t_i)}^2$ .

717 The method proposed here is slightly less rigorous than the "direct approach" of (Joucla et al.,  
718 2010), but it is far more flexible since it does not require an independent estimation or  
719 measurement of  $[Fura]_{total}$ . In the present study we also chose to consider the calibrated  
720 parameters  $K_{eff}$ ,  $R_{min}$  and  $R_{max}$  as known. Note that the values for these parameters are only  
721 estimates (necessarily imprecise since the calibration procedure is subject to errors). However,  
722 since the same batch of fura-2 was used for all experiments, they should all have the same  
723 (systematic) error. We are not trying to get the exact standard error of the calcium dynamics  
724 parameters but to show the difference between two protocols ("classical whole-cell" versus  
725 beta-escin perforated whole-cell). Ignoring the uncertainty on the calibrated parameters makes  
726 our estimates less variable and helps to make the difference if it exists, clearer. For a true  
727 calcium buffering capacity study, the errors on the calibrated parameters should be accounted  
728 for, and it would be straightforward to do it with our approach, simply by drawing also  $K_{eff}$ ,  
729  $R_{min}$  and  $R_{max}$  values from Gaussian distributions centered on their respective estimates with  
730 a SD given by the standard errors.

731

### 732 **Objective or "cost" function**

733 We know now how to get both sequences of  $[Ca^{2+}]$  estimates (Eq. 1) and standard errors  
734 from sequences of  $ADU$  measurements. We also consider a calcium dynamics model (Eq. 8-  
735 10):

$$\frac{dCa(t)}{dt} (1 + \kappa_F(Ca(t)) + \kappa_E(Ca(t))) + \frac{j(Ca(t))}{v} = 0, \quad (8)$$



736 where  $Ca(t)$  stands for  $[Ca^{2+}]_{free}$  at time  $t$ ,  $v$  is the volume of the neurite—within which  
 737 diffusion effects can be neglected — and

$$j(Ca(t)) \equiv \gamma(Ca(t) - Ca_{steady}), \quad (9)$$

738 is the model of calcium extrusion —  $Ca_{steady}$  is the steady-state [1]  $[Ca^{2+}]_{free}$  — and:

$$\kappa_F(Ca(t)) \equiv \frac{F_{total}K_F}{(K_F + Ca(t))^2} \quad \text{and} \quad \kappa_E(Ca(t)) \equiv \frac{E_{total}K_E}{(K_E + Ca(t))^2},$$

739 where  $F$  stands for the fluorophore and  $E$  for the *endogenous* buffer.

740 If the values of  $\theta \equiv (Ca_{steady}, \frac{\gamma}{v}, E_{total}, K_E, F_{total}, K_F, Ca(t=0))$  are known, we can  
 741 substitute these values in Eq. 8, solve it (numerically) and *predict* the time course of calcium  
 742 at any positive time. Let us write  $Ca(t; \theta)$  as this solution of Eq. 8. In addition to this model,  
 743 we have used the results of the previous section, on a set of  $N$  time points  $t_i$ , a collection of  
 744  $(\widehat{Ca}(t_i), \widehat{\sigma}_{\widehat{Ca}(t_i)})$ . We can then define a first *objective* or *cost* function:

$$\Omega(\theta) \equiv \sum_{i=1}^N \left( \frac{\widehat{Ca}(t_i) - Ca(t_i; \theta)}{\widehat{\sigma}_{\widehat{Ca}(t_i)}} \right)^2. \quad (10)$$

745 The next task is to find the value of  $\widehat{\theta}$  that makes  $\Omega$  as small as possible; this a classical non-  
 746 linear weighted least squares problem (see (Nielsen and Madsen, 2010)). The advantage of  
 747 this setting is that if we can find  $\widehat{\theta}$  (that is, if the minimum exists and is unique), we also get:

- 748 1. Confidence intervals for each element of  $\theta$  through their standard error (in fact, more  
 749 than that, since we get the full covariance matrix).
- 750 2. The distribution from which  $\Omega(\widehat{\theta})$  should have been drawn if the model,  $Ca(t; \widehat{\theta})$ , is  
 751 indeed correct: a  $\chi^2$  distribution with  $N - \#\theta$  degrees of freedom, where  $\#\theta$  stands for  
 752 the number of elements of  $\theta$  that are set from the fitted data.

753 *Point 2 gives us an objective basis to accept or reject a fit, an essential ingredient for the*  
754 *procedure presented here.*

755 Before going further, we should consider that  $\theta$  in the form just defined contains 7 elements  
756 among which, 2 are supposed to be known,  $K_F$  and  $F_{total}$ . That leaves 5 values to extract from  
757 the transient. This is not straightforward since the latter seems, at least at first glance, close to  
758 a mono-exponential:  $Ca(t; Ca_{steady}, \Delta, \tau) = Ca_{steady} + \Delta \exp\left(-\frac{t}{\tau}\right)$  (from which only 3  
759 parameters can be obtained). Therefore, we follow (Neher and Augustine, 1992) and consider  
760 an approximation of Eq. 8 where  $Ca(t)$  can be written as  $Ca_{steady} + \delta Ca(t)$  and where  
761  $\delta Ca(t)$  is small enough for a first order expansion of  $Ca(t)$  in the vicinity of  $Ca_{steady}$  to be  
762 valid. If we do this first order expansion, neglecting the communication between the pipette  
763 and the cytosol during the transient we get (setting  $\rho = 0$ ) in (Neher and Augustine, 1992)  
764 (Eq. 15):

$$\frac{\delta Ca(t)}{dt} = -\frac{\frac{\gamma}{v}}{1 + \kappa_F(Ca_{steady}) + \kappa_E(Ca_{steady})} \delta Ca(t). \quad (11)$$

765 Leading to:

$$Ca(t; Ca_{steady}, \Delta, \tau) = Ca_{steady} + \Delta \exp -\frac{t}{\tau}, \quad (12)$$

766 where the time constant  $\tau$  is defined by:

$$\tau(\kappa_F) \equiv \frac{1 + \kappa_F + \kappa_E}{\frac{\gamma}{v}}, \quad (13)$$

767 the dependence of the  $\kappa$  on  $Ca_{steady}$  has been made implicit. We see that if we can obtain  
768 several transients with different values of  $[Fura]_{total}$  leading to several values of  $\kappa_F$ , we can  
769 exploit the linear dependence of  $\tau$  on both  $\kappa$  to estimate  $\kappa_E$  by extrapolation. This is the  
770 essence of the added buffer approach. The implementation of the latter requires:

- 771 1. Get several (known) values of  $[Fura]_{total}$  and therefore  $\kappa_F$  in the recorded neuron.
- 772 2. Trigger a calcium entry at each of these  $\kappa_F$  values and fit *the tail of the transient* with a
- 773 mono-exponential (Eq. 12)—fitting the tail ensures that the linear approximation of Eq. 8
- 774 by Eq. 11 is valid—.
- 775 3. Plot  $\tau$  versus  $\kappa_F$  and fit a straight line to these points. The slope gives  $\frac{v}{\gamma}$  and the x-axis
- 776 intercept gives  $\kappa_E$ .

777 The fit in point 2 is done with weighted non-linear least squares using  $Ca(t; Ca_{steady}, \Delta, \tau)$

778 (Eq. 12) instead of  $Ca(t; \theta)$  in the cost function definition (Eq. 10). Each fit gives  $\hat{\tau}(\kappa_F)$  and

779  $\hat{\sigma}_{\hat{\tau}(\kappa_F)}$  together with a goodness of fit criterion. The  $(\hat{\tau}(\kappa_F), \hat{\sigma}_{\hat{\tau}(\kappa_F)})$  are used in point 3 for a

780 weighted *linear* least squares fit that also leads to confidence intervals on the estimated

781 parameters and to a goodness of fit criterion.

782 The codes doing the "heavy" part of the analysis were written in C. Some higher-level scripts

783 were written in Python 3. The codes, their documentation, the data, and the way the codes

784 were applied to the data can be found on GitHub ([https://github.com/christophe-pouzat/hess-](https://github.com/christophe-pouzat/hess-et-al-beta-escin-2019)

785 [et-al-beta-escin-2019](https://github.com/christophe-pouzat/hess-et-al-beta-escin-2019)) as well as on zenodo (<https://zenodo.org/record/3238248>). The

786 weighted linear and non-linear least squares routines, as well as the random number

787 generators, are the ones of the Gnu Scientific Library ([GSL](https://www.gnu.org/software/gsl/)). The [Lenvenberg-Marquardt](https://www.gnu.org/software/gsl/)

788 implementation of the GSL was used for the non-linear least squares. Optimization was ended

789 based on convergence criteria looking at the relative change of each estimated parameter

790 value and at the gradient norm (see the [GSL documentation](https://www.gnu.org/software/gsl/)); as a safeguard, a maximum

791 number of iterations was set, but all the optimizations did actually stop because the

792 convergence criteria were met.

793 Following Neher and Augustine (1992), our analysis of the calcium transients relies on the

794 linearization (<https://en.wikipedia.org/wiki/Linearization>) of an assumed calcium dynamics

795 (Eq. 9 to 15, (Neher and Augustine, 1992)). The key hypothesis that is made in all  
796 linearizations is that the dynamical system under investigation (here the calcium  
797 concentration) is submitted to a small perturbation from its resting state. What constitutes a  
798 "small enough" perturbation for the linearization to be valid in practice depends, in the  
799 specific case considered here, on parameters we do not know (total endogenous buffer  
800 concentration, endogenous buffer dissociation constant, etc.), but we can be sure that the  
801 closer we get to baseline, that is the later we look during the transient, the more likely the  
802 "small enough" requirement is to be met. If the linearization is valid, the transient (more  
803 precisely the portion of the transient that is fitted) must exhibit a mono-exponential decay,  
804 something we can rigorously test. In order to get a procedure usable on every transient and  
805 considering the fact that the peak response of the first transient can be large - 6 times the  
806 baseline value, not really a "small" perturbation - we decided, before seeing the data, to start  
807 all the fits from the time at which the transient had lost 50% of its peak value. This is  
808 obviously arbitrary but it does not affect our results as the reader can check by downloading  
809 our data and our code before rerunning the whole analysis using a different location from  
810 which to start the fit. Accordingly, the number of data points used for each fit varies a bit  
811 from transient to transient. *This choice of fitting from the "half-peak time" was made before*  
812 *seeing the data.* It is important to realize that once such a choice has been made, we are  
813 constrained, the fit is done automatically, and the residual sum of squares (RSS) is compatible  
814 or not with the theoretical  $\chi^2$  distribution.

815 Since we used a triple wavelength (340, 380 and 360) protocol for each point of the transient,  
816 we have access to an independent estimate of  $[Fura]_{total}$ . We saw, as in (Joucla et al., 2010)  
817 (Fig. 5), that the latter is not constant during the transients. When doing the  $\tau$  versus  $\kappa_F$  linear  
818 regression we therefore computed systematically three regressions using the minimum, the  
819 mean and the maximum observed values of  $[Fura]_{total}$  during the transient. We always

820 report the results of regression leading to the smallest RSS (best fit). As the reader can check  
821 from our GitHub repository, none of our conclusions depend on this. We emphasize again that  
822 since our method generates standard errors for  $\hat{\tau}$ , the linear regressions are accepted or  
823 rejected on an objective basis (the RSS is compatible or not with the relevant theoretical  $\chi^2$   
824 distribution).

825

826 **Figures**

827

828

829

830

831

832

Figure 1

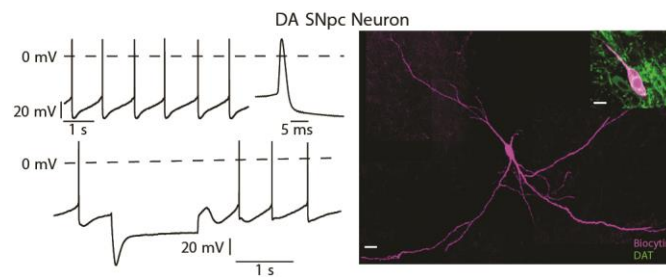

833

834

835 **Figure 1.** Basic identifying electrophysiological and morphological properties of

836 dopaminergic substantia nigra neurons. The neurons were recorded in current clamp (*left*) and

837 labeled with biocytin-streptavidin (magenta) *via* the patch pipette (*right*). The upper trace

838 shows the regular pacemaker activity and long spike duration. On the lower trace, a

839 hyperpolarizing current injection to -120 mV induced a clear 'sag potential', which is

840 mediated by  $I_h$  and typical for this neuron type. Immunohistochemistry revealed dopamine

841 transporter immunoreactivity (green), which a marker for dopaminergic neurons in the

842 substantia nigra (*right, inset*). Scale bars: 20  $\mu\text{m}$ , inset: 10  $\mu\text{m}$ .

843

844  
845  
846  
847  
848  
849

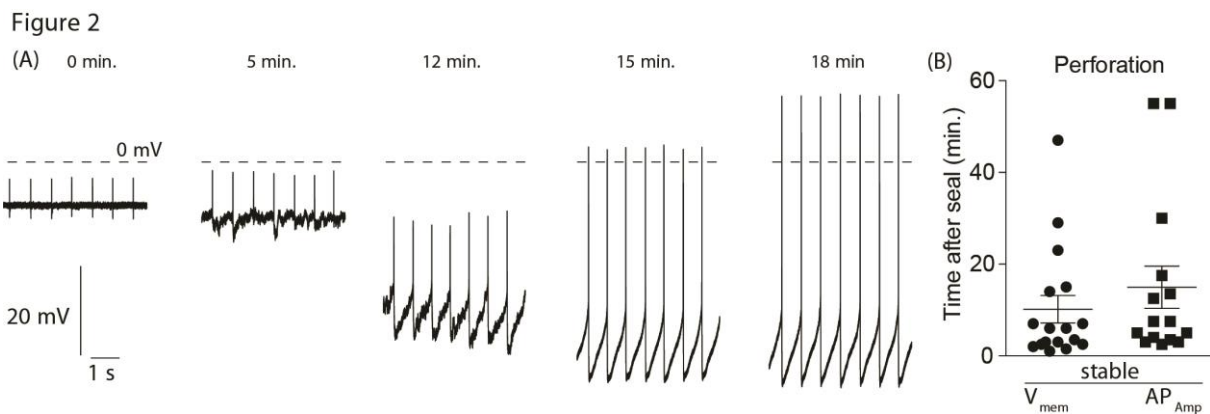

850  
851  
852  
853  
854  
855  
856  
857  
858

**Figure 2.** Perforated patch recordings of dopaminergic substantia nigra neurons using  $\beta$ -escin as a perforating agent. (A) Perforation process. Current clamp recording during the  $\beta$ -escin mediated membrane perforation showing the transition from 'on-cell' to the 'perforated-patch' configuration. The time (in min) after the seal was established, is given above each trace. (B) "Duration" of the perforation process: the time required for the baseline of the membrane potential ( $V_{mem}$ ) and the action potentials amplitude ( $AP_{Amp}$ ) to stabilize.

859

860

Figure 3

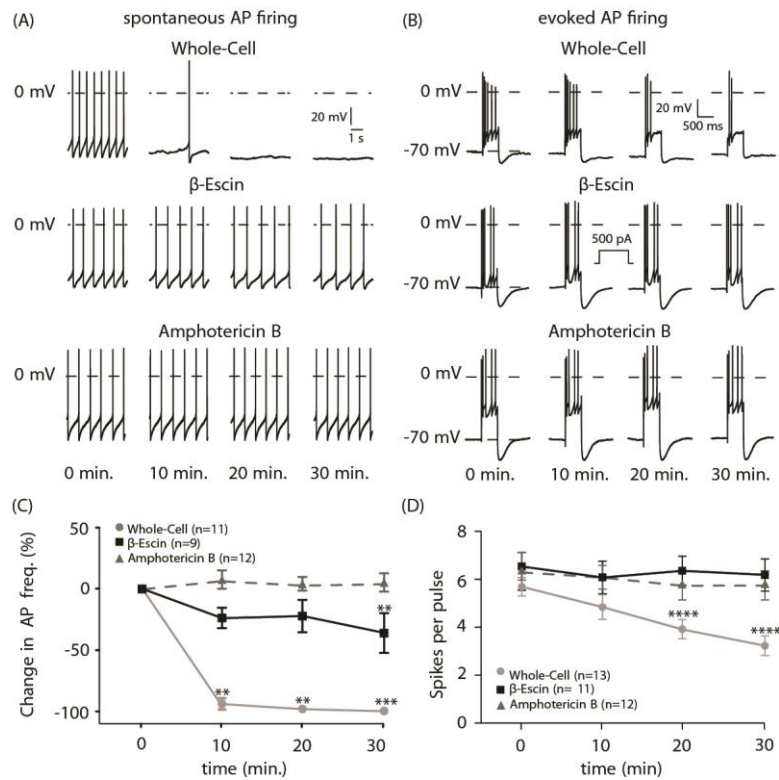

861

862

863 **Figure 3.**  $\beta$ -escin mediated perforated patch clamp recordings allow stable recordings. (A,B)

864 spontaneous activity (A) and depolarization-induced spike trains (B) recorded from DA SN

865 neurons in the whole-cell and perforated patch clamp ( $\beta$ -escin- or amphotericin mediated)

866 configuration at different times after reaching “stable” recording conditions. (C,D) Stability

867 of electrophysiological parameters in the different recording configurations. (C) Spontaneous

868 activity. Friedman-test with post-hoc Dunn’s multiple comparison test. (D) The number of

869 action potentials per current pulse (holding potential -70 mV; current pulse, 500 pA for 500

870 ms). Note that the large hyperpolarization following the current injection disappeared during

871 the whole-cell recording. Repeated measures one-way ANOVA with Dunnett’s multiple

872 comparison test. \*\*:  $p \leq 0.01$ , \*\*\*:  $p \leq 0.001$ , \*\*\*\*:  $p \leq 0.0001$ .

873



874  
875  
876  
877  
878

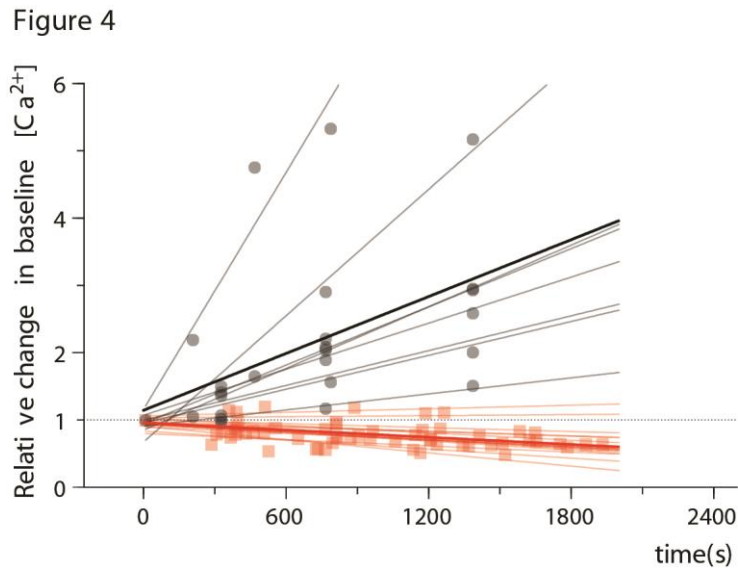

879  
880  
881  
882  
883  
884  
885  
886  
887

**Figure 4.** Intracellular  $Ca^{2+}$  concentrations remain stable during  $\beta$ -escin mediated perforated patch clamp recordings. Relative changes in intracellular  $Ca^{2+}$  concentration during the time course of  $\beta$ -escin perforated (pale red, red) and whole-cell patch clamp recordings (grey, black). Linear fits of all experiments (pale red and grey) are shown, with individual data points represented as squares. The bold red and black line are the linear fits of all  $\beta$ -escin perforated and whole-cell recordings. Whole-cell n=8;  $\beta$ -escin n=13.  $p < 0.0001$ ; F-test.

888

889

890

891

892

Figure 5

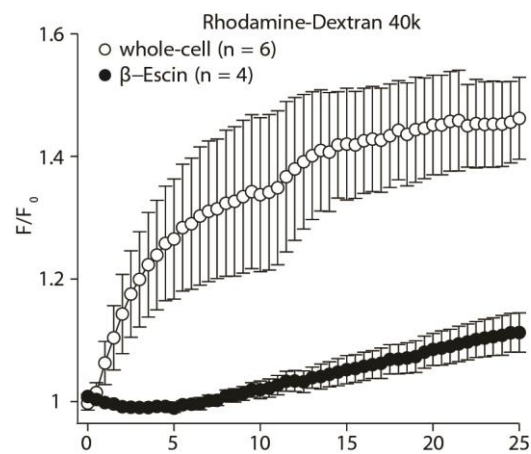

893

894

895 **Figure 5.** Large molecules diffuse very slowly through the perforated membrane during patch

896 clamp recordings with  $\beta$ -escin. Time course of tetramethylrhodamine-dextran (40 kDa)

897 fluorescence in DA SN neurons for whole-cell (○) and  $\beta$ -escin perforated patch recordings

898 (●). n-values are given in the figure. Values are mean  $\pm$  SEM.

899

Figure 6

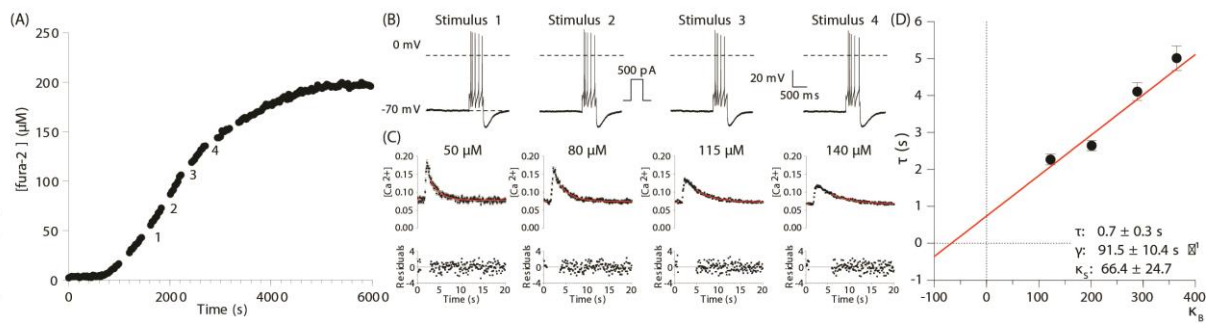

900

901

902 **Figure 6.** Outline of the  $\text{Ca}^{2+}$  handling properties analysis.  $\text{Ca}^{2+}$  handling was analyzed using  
 903 a combination of patch clamp recordings, ratiometric  $\text{Ca}^{2+}$  imaging, and the ‘added buffer  
 904 approach’. (A-D) demonstrate the principal steps of the analysis for a single DA SN neuron.

905 The neuron was recorded and fura-2-loaded in the  $\beta$ -escin perforated patch clamp  
 906 configuration. (A) Fura-2 loading curve. Neurons were loaded via the patch pipette with the  
 907 ratiometric  $\text{Ca}^{2+}$  indicator fura-2, which also serves as the added  $\text{Ca}^{2+}$  buffer. Fura-2

908 fluorescence was acquired at 360 nm excitation (isosbestic point of fura-2) every 30 s and  
 909 converted into fura-2 concentrations. (B) Spike trains that induce the voltage-activated  $\text{Ca}^{2+}$   
 910 influx shown in (C) at different times during loading, as indicated in (A). (C)

911 Monoexponential fits of the individual  $\text{Ca}^{2+}$  transients following the four stimulations. The  
 912 graphs demonstrate the effect of the increasing added  $\text{Ca}^{2+}$  buffer (fura-2) concentration on  
 913 the amplitude, and decay kinetics of voltage evoked transients of free  $\text{Ca}^{2+}$ : the amplitude  
 914 decrease while the decay time increases. Notice the error bars on the individual data points.

915 These error bars allow us to properly normalize the residuals (the difference between  
 916 observed and fitted values divided by the standard deviation) shown below. If the mono-  
 917 exponential model is correct and if its parameters have been properly estimated, these  
 918 residuals should be (approximately) drawn for a Gaussian distribution with mean 0 and SD 1.

919 (D) The decay time constants were plotted against the  $\text{Ca}^{2+}$  binding ratios of fura-2 ( $\kappa_B$ ).  $\kappa_B$   
 920 was calculated from the intracellular fura-2 concentration, the  $K_d$  of fura-2, and the resting  
 921 concentration of free intracellular  $\text{Ca}^{2+}$ . The solid red line is the linear fit to the data. An  
 922 estimate of  $\kappa_S$  was obtained as the negative x-axis intercept. The  $\text{Ca}^{2+}$  extrusion rate is  
 923 estimated from the slope of the fit and the endogenous decay time constant from the intercept

924 with the y-axis. The resulting  $\text{Ca}^{2+}$  handling parameters of this example are:  $\tau_{\text{endo}}$ :  $0.7 \pm 0.3$  s,  
 925  $\gamma$ :  $91.5 \pm 10.4$ ,  $\text{s}^{-1}$ ,  $\kappa_S$ :  $66.4 \pm 24.7$ .

926

Figure 7

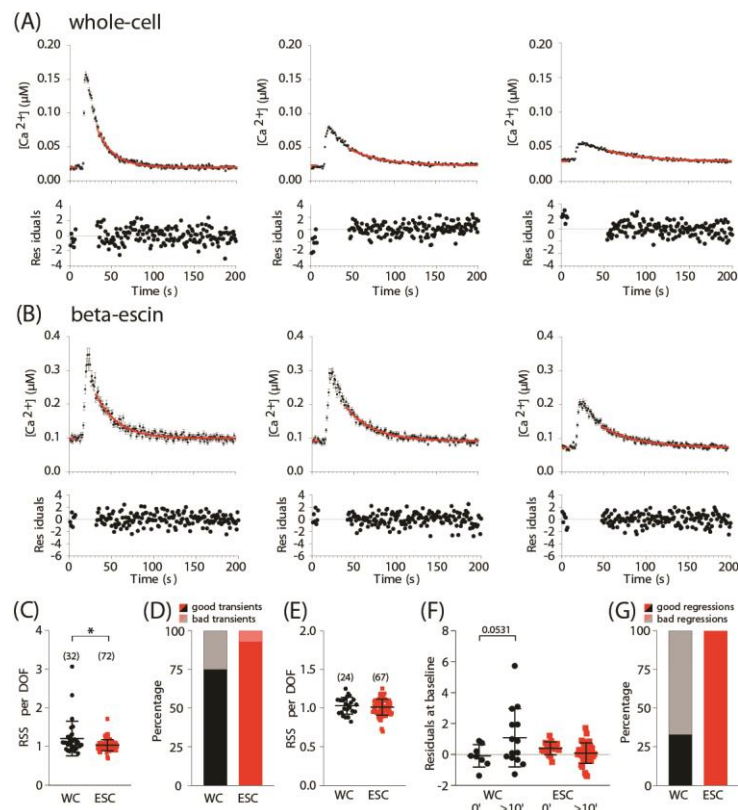

927

928

929 **Figure 7.** The goodness of fit comparison between  $Ca^{2+}$  transients recorded in the whole-cell

930 and  $\beta$ -escin perforated patch clamp configuration. In both configurations, SN neurons were

931 loaded with fura-2 via the recording pipette, as illustrated in figure 6. (A, B) Induced  $Ca^{2+}$

932 transients with increasing added  $Ca^{2+}$  buffer (fura-2) concentrations (from left to right). The

933 monoexponential fit is shown in red with the residuals below. (C) Comparison of Residual

934 Sum of Squares (RSS) per Degrees Of Freedom (DOF) between all recorded  $Ca^{2+}$  transients

935 under both recording configurations; if everything goes well, a value close to 1 should be

936 obtained. (D) Percentage of ‘good transients’ vs ‘bad transients’ (E) RSS per DOF of the

937 ‘good transients’ shown in (D). (F) Comparisons of the residuals of the baseline fits at the

938 beginning of the recording and more than 10 minutes after the beginning of the recording for

939 both recording configurations. (G) Percentage of data sets with at least three ‘good transients’

940 that provided acceptable regressions.



Figure 8

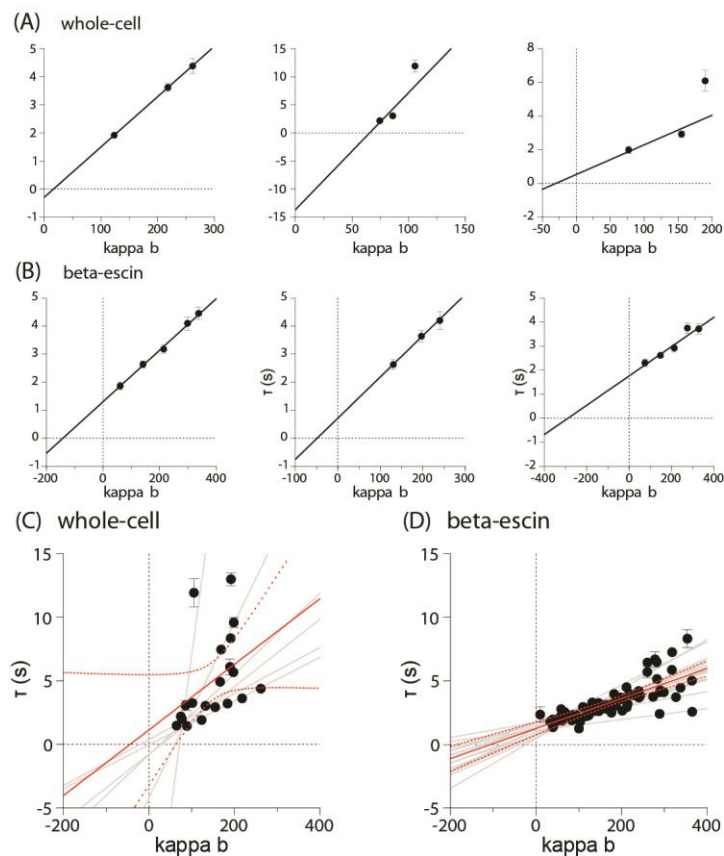

942  
943

944 **Figure 8.**  $\beta$ -escin perforated patch clamp recordings provide systematically plausible  $\text{Ca}^{2+}$   
945 handling properties. (A,B)  $\tau_{transient}$  -  $\kappa_B$  relations of ‘added buffer’ experiments using the  
946 whole-cell (A) and  $\beta$ -escin perforated patch clamp configuration (B). (A) Data sets of three  
947 neurons obtained using the whole-cell configuration, demonstrating that this approach can  
948 provide plausible (right panel) and implausible (middle and left panel) results. (B) Three data  
949 sets that were obtained using the  $\beta$ -escin perforated configuration. Note the consistently  
950 ‘better fits’ and the higher plausibility of the x-axis intercept compared to (A). (C,D)  $\tau_{transient}$  -  
951  $\kappa_B$  relations of 6 SN neurons recorded in the whole-cell configuration (C) and 15 SN neurons  
952 recorded in the  $\beta$ -escin perforated patch clamp configuration (D). To demonstrate that the  
953 implausibility of individual data sets can be masked if pooled data sets of multiple neurons are  
954 analyzed, fitting was performed for the pooled data and for each neuron individually. For the  
955 pooled data, the best linear fits with 95% confidence bands are shown (solid and dashed red  
956 lines).

957

Supplement Figure 1

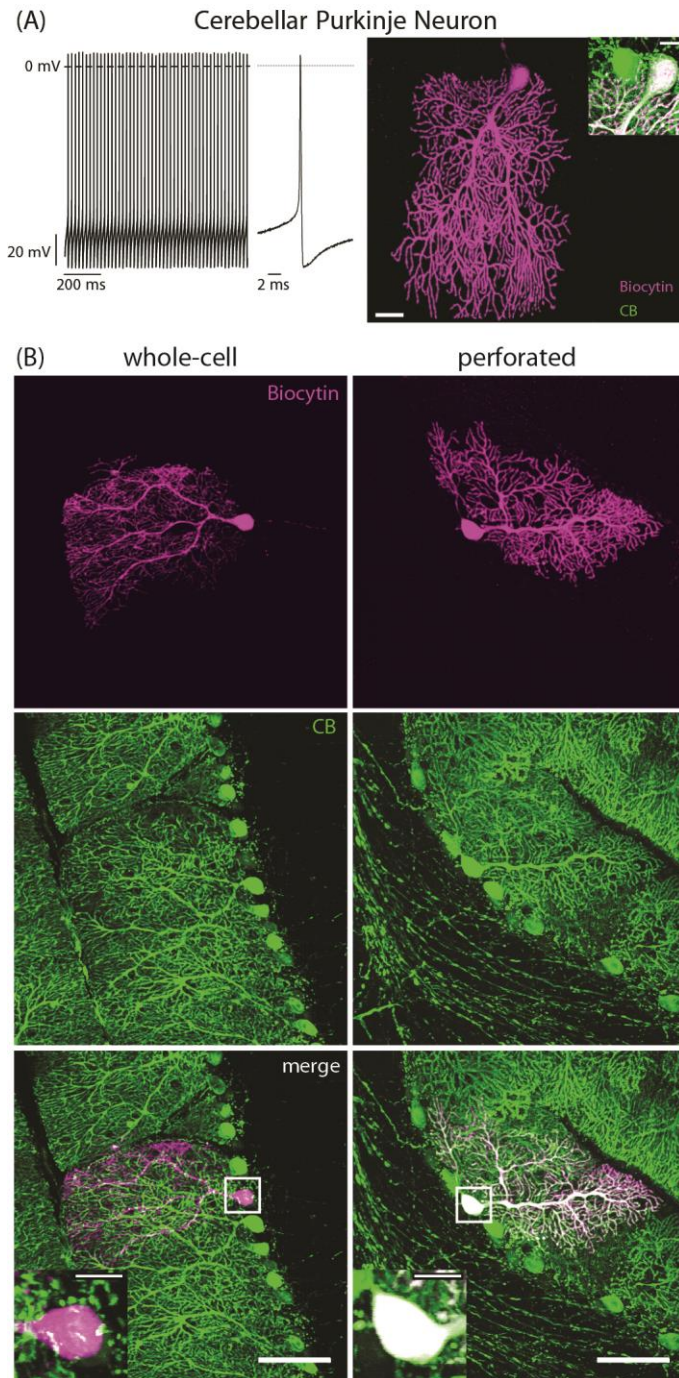

**Supplement Figure 1.** The  $\text{Ca}^{2+}$  binding protein calbindin D-28k is retained in cerebellar Purkinje neurons during  $\beta$ -escin perforated patch recording. (A) Basic electrophysiological and morphological characteristics of a Purkinje neuron. The neurons were recorded in current clamp and labeled with biocytin-streptavidin (magenta) via the patch pipette. The recording demonstrates the high spontaneous action potential frequency and the short action potential duration, which both are typical for this neuron type. Immunohistochemical labeling demonstrates strong immunoreactivity for calbindin D-28k, which is typical for Purkinje cells (inset). (B) The  $\text{Ca}^{2+}$  binding protein calbindin D-28k is washed out during whole-cell

980 recording (left column), while it is retained in neurons during  $\beta$ -escin perforated patch  
981 recording. (right column). The images show two biocytin-streptavidin labeled Purkinje cells  
982 (top panels) and their calbindin D-28k immunoreactivity (middle panels). The overlay of both  
983 labels is shown in the bottom panels. Both neurons were recorded for 30 min. Scale bars: 20  
984  $\mu\text{m}$ , insets: 10  $\mu\text{m}$ .

985 **References**

- 986
- 987 Abe H, Watanabe M, Yamakuni T, Kuwano R, Takahashi Y, Kondo H. 1992. Localization of  
988 gene expression of calbindin in the brain of adult rats. *Neuroscience Letters* **138**:211–  
989 215. doi:10.1016/0304-3940(92)90917-V
- 990 Akaike N. 1994. Glycine responses in rat CNS neurons studied with gramicidin perforated  
991 patch recording. *The Japanese journal of physiology* **44 Suppl 2**:S113–8.
- 992 Akaike N, Harata N. 1994. Nystatin Perforated Patch Recording and Its Applications to  
993 Analyses of Intracellular Mechanisms. *The Japanese Journal of Physiology* **44**:433–  
994 473. doi:10.2170/jjphysiol.44.433
- 995 Augustine GJ, Santamaria F, Tanaka K. 2003. Local Calcium Signaling in Neurons. *Neuron*  
996 **40**:331–346. doi:10.1016/s0896-6273(03)00639-1
- 997 Bangham AD, Horne RW, Glauert AM, Dingle JT, Lucy JA. 1962. Action of Saponin on  
998 Biological Cell Membranes. *Nature* **196**:196952a0. doi:10.1038/196952a0
- 999 Bean BP. 2007. The action potential in mammalian central neurons. *Nature Reviews*  
1000 *Neuroscience* **8**:nrn2148. doi:10.1038/nrn2148
- 1001 Berridge MJ. 2011. Calcium Signalling and Alzheimer’s Disease. *Neurochem Res* **36**:1149–  
1002 1156. doi:10.1007/s11064-010-0371-4
- 1003 Berridge MJ. 2006. Calcium microdomains: Organization and function. *Cell Calcium* **40**:405–  
1004 412. doi:10.1016/j.ceca.2006.09.002
- 1005 Berridge MJ. 1998. Neuronal Calcium Signaling. *Neuron* **21**:13–26. doi:10.1016/s0896-  
1006 6273(00)80510-3
- 1007 Berridge MJ, Lipp P, Bootman MD. 2000. The versatility and universality of calcium  
1008 signalling. *Nature Reviews Molecular Cell Biology* **1**:11. doi:10.1038/35036035
- 1009 Böttger S, Melzig MF. 2013. The influence of saponins on cell membrane cholesterol.  
1010 *Bioorganic & Medicinal Chemistry* **21**:7118–7124. doi:10.1016/j.bmc.2013.09.008
- 1011 Chan CS, Gertler TS, Surmeier DJ. 2009. Calcium homeostasis, selective vulnerability and  
1012 Parkinson’s disease. *Trends in Neurosciences* **32**:249–256.  
1013 doi:10.1016/j.tins.2009.01.006
- 1014 Ciliax B, Heilman C, Demchyshyn L, Pristupa Z, Ince E, Hersch S, Niznik H, Levey A. 1995.  
1015 The dopamine transporter: immunochemical characterization and localization in brain.  
1016 *J Neurosci* **15**:1714–1723. doi:10.1523/JNEUROSCI.15-03-01714.1995
- 1017 Clapham DE. 2007. Calcium Signaling. *Cell* **131**:1047–1058. doi:10.1016/j.cell.2007.11.028
- 1018 De Kruijff B, Demel RA. 1974. Polyene antibiotic-sterol interactions in membranes of  
1019 *Acholeplasma laidlawii* cells and lecithin liposomes. III. Molecular structure of the  
1020 polyene antibiotic-cholesterol complexes. *Biochimica et Biophysica Acta (BBA) -*  
1021 *Biomembranes* **339**:57–70. doi:10.1016/0005-2736(74)90332-0
- 1022 Delvendahl I, Jablonski L, Baade C, Matveev V, Neher E, Hallermann S. 2015. Reduced  
1023 endogenous Ca<sup>2+</sup> buffering speeds active zone Ca<sup>2+</sup> signaling. *Proc Natl Acad Sci*  
1024 *USA* **112**:E3075–E3084. doi:10.1073/pnas.1508419112
- 1025 Dodt H-U, Zieglgänsberger W. 1990. Visualizing unstained neurons in living brain slices by  
1026 infrared DIC-videomicroscopy. *Brain Research* **537**:333–336. doi:10.1016/0006-  
1027 8993(90)90380-t
- 1028 Fan J-S, Palade P. 1998. Perforated Patch Recording with β-escin. *Pflügers Archiv* **436**:1021–  
1029 1023. doi:10.1007/pl00008086
- 1030 Fierro L, Llano I. 1996. High endogenous calcium buffering in Purkinje cells from rat  
1031 cerebellar slices. *The Journal of Physiology* **496**:617–625.  
1032 doi:10.1113/jphysiol.1996.sp021713
- 1033 Fournet N, Garcia-Segura LM, Norman AW, Orci L. 1986. Selective localization of calcium-  
1034 binding protein in human brainstem, cerebellum and spinal cord. *Brain Research*



- 1035           **399**:310–316. doi:10.1016/0006-8993(86)91521-0
- 1036 Gilabert JA. 2020. Cytoplasmic Calcium Buffering: An Integrative Crosstalk In: Islam MdS,  
1037 editor. Calcium Signaling. Cham: Springer International Publishing. pp. 163–182.  
1038 doi:10.1007/978-3-030-12457-1\_7
- 1039 Grynkiewicz G, Poenie M, Tsien RY. 1985. A new generation of Ca<sup>2+</sup> indicators with greatly  
1040 improved fluorescence properties. *The Journal of biological chemistry* **260**:3440–50.
- 1041 Harrison SM, Bers DM. 1989. Correction of proton and Ca association constants of EGTA for  
1042 temperature and ionic strength. *American Journal of Physiology-Cell Physiology*  
1043 **256**:C1250–C1256. doi:10.1152/ajpcell.1989.256.6.c1250
- 1044 Harrison SM, Bers DM. 1987. The effect of temperature and ionic strength on the apparent  
1045 Ca-affinity of EGTA and the analogous Ca-chelators BAPTA and dibromo-BAPTA.  
1046 *Biochimica et Biophysica Acta (BBA) - General Subjects* **925**:133–143.  
1047 doi:10.1016/0304-4165(87)90102-4
- 1048 Helmchen F, Borst JG, Sakmann B. 1997. Calcium dynamics associated with a single action  
1049 potential in a CNS presynaptic terminal. *Biophysical Journal* **72**:1458–1471.  
1050 doi:10.1016/s0006-3495(97)78792-7
- 1051 Helmchen F, Imoto K, Sakmann B. 1996. Ca<sup>2+</sup> buffering and action potential-evoked Ca<sup>2+</sup>  
1052 signaling in dendrites of pyramidal neurons. *Biophysical Journal* **70**:1069–1081.  
1053 doi:10.1016/s0006-3495(96)79653-4
- 1054 Helmchen F, Tank DW. 2015. A Single-Compartment Model of Calcium Dynamics in Nerve  
1055 Terminals and Dendrites. *Cold Spring Harbor Protocols* **2015**:pdb.top085910.  
1056 doi:10.1101/pdb.top085910
- 1057 Hess ME, Hess S, Meyer KD, Verhagen LAW, Koch L, Brönneke HS, Dietrich MO, Jordan  
1058 SD, Saletore Y, Elemento O, Belgardt BF, Franz T, Horvath TL, Rüter U, Jaffrey SR,  
1059 Kloppenburg P, Brüning JC. 2013. The fat mass and obesity associated gene (Fto)  
1060 regulates activity of the dopaminergic midbrain circuitry. *Nature Neuroscience*  
1061 **16**:nn.3449. doi:10.1038/nn.3449
- 1062 Horn R, Marty A. 1988. Muscarinic activation of ionic currents measured by a new whole-cell  
1063 recording method. *The Journal of General Physiology* **92**:145–159.  
1064 doi:10.1085/jgp.92.2.145
- 1065 Husch A, Cramer N, Harris-Warrick RM. 2011. Long-duration perforated patch recordings  
1066 from spinal interneurons of adult mice. *Journal of neurophysiology* **106**:2783–9.  
1067 doi:10.1152/jn.00673.2011
- 1068 Iizuka K, Dobashi K, Yoshii A, Horie T, Suzuki H, Nakazawa T, Mori M. 1997. Receptor-  
1069 dependent G protein-mediated Ca<sup>2+</sup> sensitization in canine airway smooth muscle.  
1070 *Cell Calcium* **22**:21–30. doi:10.1016/s0143-4160(97)90086-5
- 1071 Iizuka K, Ikebe M, Somlyo AV, Somlyo AP. 1994. Introduction of high molecular weight  
1072 (IgG) proteins into receptor coupled, permeabilized smooth muscle. *Cell Calcium*  
1073 **16**:431–445. doi:10.1016/0143-4160(94)90073-6
- 1074 Inoue S, Murata K, Tanaka A, Kakuta E, Tanemura S, Hatakeyama S, Nakamura A,  
1075 Yamamoto C, Hasebe M, Kosakai K, Yoshino M. 2014. Ionic channel mechanisms  
1076 mediating the intrinsic excitability of Kenyon cells in the mushroom body of the  
1077 cricket brain. *Journal of Insect Physiology* **68**:44–57.  
1078 doi:10.1016/j.jinsphys.2014.06.013
- 1079 Jackson MB, Redman SJ. 2003. Calcium Dynamics, Buffering, and Buffer Saturation in the  
1080 Boutons of Dentate Granule-Cell Axons in the Hilus. *Journal of Neuroscience*  
1081 **23**:1612–1621. doi:10.1523/jneurosci.23-05-01612.2003
- 1082 Joucla S, Pippow A, Kloppenburg P, Pouzat C. 2010. Quantitative estimation of calcium  
1083 dynamics from ratiometric measurements: a direct, nonratioing method. *Journal of*  
1084 *neurophysiology* **103**:1130–44. doi:10.1152/jn.00414.2009
- 1085 Klöckener T, Hess S, Belgardt BF, Paeger L, Verhagen LAW, Husch A, Sohn J-W, Hampel B,

- 1086 Dhillon H, Zigman JM, Lowell BB, Williams KW, Elmquist JK, Horvath TL,  
1087 Kloppenburg P, Brüning JC. 2011. High-fat feeding promotes obesity via insulin  
1088 receptor/PI3K-dependent inhibition of SF-1 VMH neurons. *Nature Neuroscience*  
1089 **14**:911. doi:10.1038/nn.2847
- 1090 Kloppenburg P, Zipfel WR, Webb WW, Harris-Warrick RM. 2000. Highly Localized Ca<sup>2+</sup>  
1091 Accumulation Revealed by Multiphoton Microscopy in an Identified Motoneuron and  
1092 Its Modulation by Dopamine. *Journal of Neuroscience* **20**:2523–2533.  
1093 doi:10.1523/jneurosci.20-07-02523.2000
- 1094 Kobayashi S, Kitazawa T, Somlyo AV, Somlyo AP. 1989. Cytosolic heparin inhibits  
1095 muscarinic and alpha-adrenergic Ca<sup>2+</sup> release in smooth muscle. Physiological role of  
1096 inositol 1,4,5-trisphosphate in pharmacomechanical coupling. *J Biol Chem*  
1097 **264**:17997–18004.
- 1098 Konishi M, Watanabe M. 1995. Resting cytoplasmic free Ca<sup>2+</sup> concentration in frog skeletal  
1099 muscle measured with fura-2 conjugated to high molecular weight dextran. *The*  
1100 *Journal of General Physiology* **106**:1123–1150. doi:10.1085/jgp.106.6.1123
- 1101 Köonner AC, Hess S, Tovar S, Mesaros A, Sánchez-Lasheras C, Evers N, Verhagen LAW,  
1102 Brönneke HS, Kleinridders A, Hampel B, Kloppenburg P, Brüning JC. 2011. Role for  
1103 Insulin Signaling in Catecholaminergic Neurons in Control of Energy Homeostasis.  
1104 *Cell Metabolism* **13**:720–728. doi:10.1016/j.cmet.2011.03.021
- 1105 Korn SJ, Horn R. 1989. Influence of sodium-calcium exchange on calcium current rundown  
1106 and the duration of calcium-dependent chloride currents in pituitary cells, studied with  
1107 whole cell and perforated patch recording. *The Journal of General Physiology*  
1108 **94**:789–812. doi:10.1085/jgp.94.5.789
- 1109 Kruijff BD, Gerritsen WJ, Oerlemans A, Demel RA, Deenen LLM van. 1974. Polyene  
1110 antibiotic-sterol interactions in membranes of *Acholeplasma laidlawii* cells and  
1111 lecithin liposomes. I. Specificity of the membrane permeability changes induced by  
1112 the polyene antibiotics. *Biochimica et Biophysica Acta (BBA) - Biomembranes*  
1113 **339**:30–43. doi:10.1016/0005-2736(74)90330-7
- 1114 Kuchibhotla KV, Goldman ST, Lattarulo CR, Wu H-Y, Hyman BT, Bacsikai BJ. 2008. Aβ  
1115 Plaques Lead to Aberrant Regulation of Calcium Homeostasis In Vivo Resulting in  
1116 Structural and Functional Disruption of Neuronal Networks. *Neuron* **59**:214–225.  
1117 doi:10.1016/j.neuron.2008.06.008
- 1118 Kyrozis A, Reichling DB. 1995. Perforated-patch recording with gramicidin avoids artifactual  
1119 changes in intracellular chloride concentration. *Journal of Neuroscience Methods*  
1120 **57**:27–35. doi:10.1016/0165-0270(94)00116-x
- 1121 Lacey M, Mercuri N, North R. 1989. Two cell types in rat substantia nigra zona compacta  
1122 distinguished by membrane properties and the actions of dopamine and opioids.  
1123 *Journal of Neuroscience* **9**:1233–1241. doi:10.1523/jneurosci.09-04-01233.1989
- 1124 Lee S, Rosenmund C, Schwaller B, Neher E. 2000a. Differences in Ca<sup>2+</sup> buffering properties  
1125 between excitatory and inhibitory hippocampal neurons from the rat. *The Journal of*  
1126 *Physiology* **525**:405–418. doi:10.1111/j.1469-7793.2000.t01-3-00405.x
- 1127 Lee S, Schwaller B, Neher E. 2000b. Kinetics of Ca<sup>2+</sup> binding to parvalbumin in bovine  
1128 chromaffin cells: implications for [Ca<sup>2+</sup>] transients of neuronal dendrites. *The Journal*  
1129 *of Physiology* **525**:419–432. doi:10.1111/j.1469-7793.2000.t01-2-00419.x
- 1130 Lin K-H, Taschenberger H, Neher E. 2017. Dynamics of volume-averaged intracellular Ca<sup>2+</sup>  
1131 in a rat CNS nerve terminal during single and repetitive voltage-clamp  
1132 depolarizations: Presynaptic [Ca<sup>2+</sup>]<sub>i</sub> dynamics at the rat calyx of Held terminal. *J*  
1133 *Physiol* **595**:3219–3236. doi:10.1113/JP272773
- 1134 Lindau M, Fernandez JM. 1986. IgE-mediated degranulation of mast cells does not require  
1135 opening of ion channels. *Nature* **319**:319150a0. doi:10.1038/319150a0
- 1136 Lips MB, Keller BU. 1998. Endogenous calcium buffering in motoneurons of the nucleus

- 1137 hypoglossus from mouse. *The Journal of Physiology* **511**:105–117.  
1138 doi:10.1111/j.1469-7793.1998.105bi.x
- 1139 Liu X, Shao R, Li M, Yang G. 2014. Edaravone Protects Neurons in the Rat Substantia Nigra  
1140 Against 6-Hydroxydopamine-Induced Oxidative Stress Damage. *Cell Biochemistry*  
1141 *and Biophysics* **70**:1247–1254. doi:10.1007/s12013-014-0048-8
- 1142 Maravall M, Mainen ZF, Sabatini BL, Svoboda K. 2000. Estimating Intracellular Calcium  
1143 Concentrations and Buffering without Wavelength Ratioing. *Biophysical Journal*  
1144 **78**:2655–2667. doi:10.1016/s0006-3495(00)76809-3
- 1145 Matthews EA, Schoch S, Dietrich D. 2013. Tuning Local Calcium Availability: Cell-Type-  
1146 Specific Immobile Calcium Buffer Capacity in Hippocampal Neurons. *The Journal of*  
1147 *Neuroscience* **33**:14431–14445. doi:10.1523/jneurosci.4118-12.2013
- 1148 Mattson MP. 2007. Calcium and neurodegeneration. *Aging Cell* **6**:337–350.  
1149 doi:10.1111/j.1474-9726.2007.00275.x
- 1150 McGuigan JAS, Kay JW, Elder HY, Lüthi D. 2007. Comparison between measured and  
1151 calculated ionised concentrations in Mg<sup>2+</sup> /ATP, Mg<sup>2+</sup> /EDTA and Ca<sup>2+</sup> /EGTA  
1152 buffers; influence of changes in temperature, pH and pipetting errors on the ionised  
1153 concentrations. *Magnesium research* **20**:72–81.
- 1154 McGuigan JAS, Lthi D, Buri A. 1991. Calcium buffer solutions and how to make them: A do  
1155 it yourself guide. *Canadian Journal of Physiology and Pharmacology* **69**:1733–1749.  
1156 doi:10.1139/y91-257
- 1157 McKay BE, Turner RW. 2005. Physiological and morphological development of the rat  
1158 cerebellar Purkinje cell. *The Journal of Physiology* **567**:829–850.  
1159 doi:10.1113/jphysiol.2005.089383
- 1160 McKay BE, Turner RW. 2004. Kv3 K<sup>+</sup> channels enable burst output in rat cerebellar Purkinje  
1161 cells. *European Journal of Neuroscience* **20**:729–739. doi:10.1111/j.1460-  
1162 9568.2004.03539.x
- 1163 Müller A, Kukley M, Stausberg P, Beck H, Müller W, Dietrich D. 2005. Endogenous Ca<sup>2+</sup>  
1164 buffer concentration and Ca<sup>2+</sup> microdomains in hippocampal neurons. *J Neurosci*  
1165 **25**:558–565. doi:10.1523/JNEUROSCI.3799-04.2005
- 1166 Murru S, Hess S, Barth E, Almajan ER, Schatton D, Hermans S, Brodesser S, Langer T,  
1167 Kloppenburg P, Rugarli EI. 2019. Astrocyte-specific deletion of the mitochondrial  
1168 m<sup>61</sup>AAA protease reveals glial contribution to neurodegeneration. *Glia*.  
1169 doi:10.1002/glia.23626
- 1170 Myers VB, Haydon DA. 1972. Ion transfer across lipid membranes in the presence of  
1171 gramicidin A. *Biochimica et Biophysica Acta (BBA) - Biomembranes* **274**:313–322.  
1172 doi:10.1016/0005-2736(72)90179-4
- 1173 Neher E, Augustine GJ. 1992. Calcium gradients and buffers in bovine chromaffin cells. *The*  
1174 *Journal of Physiology* **450**:273–301. doi:10.1113/jphysiol.1992.sp019127
- 1175 Neuhoff H, Neu A, Liss B, Roeper J. 2002. Ih Channels Contribute to the Different Functional  
1176 Properties of Identified Dopaminergic Subpopulations in the Midbrain. *Journal of*  
1177 *Neuroscience* **22**:1290–1302. doi:10.1523/jneurosci.22-04-01290.2002
- 1178 Nielsen H, Madsen K. 2010. Introduction to Optimization and Data Fitting.
- 1179 Orta G, Ferreira G, José O, Treviño CL, Beltrán C, Darszon A. 2012. Human spermatozoa  
1180 possess a calcium-dependent chloride channel that may participate in the acrosomal  
1181 reaction. *The Journal of Physiology* **590**:2659–2675.  
1182 doi:10.1113/jphysiol.2011.224485
- 1183 Paeger L, Pippow A, Hess S, Paehler M, Klein AC, Husch A, Pouzat C, Brüning JC,  
1184 Kloppenburg P. 2017. Energy imbalance alters Ca<sup>2+</sup> handling and excitability of  
1185 POMC neurons. *eLife* **6**:e25641. doi:10.7554/elife.25641
- 1186 Palecek J, Lips MB, Keller BU. 1999. Calcium dynamics and buffering in motoneurons of  
1187 the mouse spinal cord. *The Journal of Physiology* **520**:485–502. doi:10.1111/j.1469-

- 1188 7793.1999.00485.x
- 1189 Patton C, Thompson S, Epel D. 2004. Some precautions in using chelators to buffer metals in  
1190 biological solutions. *Cell Calcium* **35**:427–431. doi:10.1016/j.ceca.2003.10.006
- 1191 Pippow A, Husch A, Pouzat C, Kloppenburg P. 2009. Differences of Ca<sup>2+</sup> handling properties  
1192 in identified central olfactory neurons of the antennal lobe. *Cell Calcium* **46**:87–98.  
1193 doi:10.1016/j.ceca.2009.05.004
- 1194 Poenie M. 1990. Alteration of intracellular Fura-2 fluorescence by viscosity: A simple  
1195 correction. *Cell Calcium* **11**:85–91. doi:10.1016/0143-4160(90)90062-y
- 1196 Rae J, Cooper K, Gates P, Watsky M. 1991. Low access resistance perforated patch recordings  
1197 using amphotericin B. *Journal of Neuroscience Methods* **37**:15–26. doi:10.1016/0165-  
1198 0270(91)90017-t
- 1199 Richards CD, Shiroyama T, Kitai ST. 1997. Electrophysiological and immunocytochemical  
1200 characterization of GABA and dopamine neurons in the substantia nigra of the rat.  
1201 *Neuroscience* **80**:545–557. doi:10.1016/s0306-4522(97)00093-6
- 1202 Russell JM, Eaton DC, Brodwick MS. 1977. Effects of nystatin on membrane conductance  
1203 and internal ion activities in *Aplysia* neurons. *J Membr Biol* **37**:137–156.  
1204 doi:10.1007/BF01940929
- 1205 Sabatini BL, Oertner TG, Svoboda K. 2002. The Life Cycle of Ca<sup>2+</sup> Ions in Dendritic Spines.  
1206 *Neuron* **33**:439–452. doi:10.1016/s0896-6273(02)00573-1
- 1207 Sarantopoulos C, McCallum JB, Kwok W-M, Hogan Q. 2004.  $\beta$ -escin diminishes voltage-  
1208 gated calcium current rundown in perforated patch-clamp recordings from rat primary  
1209 afferent neurons. *Journal of Neuroscience Methods* **139**:61–68.  
1210 doi:10.1016/j.jneumeth.2004.04.015
- 1211 Sirtori CR. 2001. Aescin: pharmacology, pharmacokinetics and therapeutic profile.  
1212 *Pharmacological Research* **44**:183–193. doi:10.1006/phrs.2001.0847
- 1213 Smits SM, Oerthel L von, Hoekstra EJ, Burbach JPH, Smidt MP. 2013. Molecular Marker  
1214 Differences Relate to Developmental Position and Subsets of Mesodiencephalic  
1215 Dopaminergic Neurons. *PLoS ONE* **8**:e76037. doi:10.1371/journal.pone.0076037
- 1216 Tajima Y, Ono K, Akaike N. 1996. Perforated patch-clamp recording in cardiac myocytes  
1217 using cation-selective ionophore gramicidin. *American Journal of Physiology-Cell*  
1218 *Physiology* **271**:C524–C532. doi:10.1152/ajpcell.1996.271.2.C524
- 1219 Tank D, Regehr W, Delaney K. 1995. A quantitative analysis of presynaptic calcium dynamics  
1220 that contribute to short-term enhancement. *Journal of Neuroscience* **15**:7940–7952.  
1221 doi:10.1523/jneurosci.15-12-07940.1995
- 1222 Ungless MA, Whistler JL, Malenka RC, Bonci A. 2001. Single cocaine exposure in vivo  
1223 induces long-term potentiation in dopamine neurons. *Nature* **411**:583.  
1224 doi:10.1038/35079077
- 1225 Urry DW. 1971. The Gramicidin A Transmembrane Channel: A Proposed  $\pi$ (L,D) Helix.  
1226 *Proceedings of the National Academy of Sciences* **68**:672–676.  
1227 doi:10.1073/pnas.68.3.672
- 1228 Vanselow BK, Keller BU. 2000. Calcium dynamics and buffering in oculomotor neurones  
1229 from mouse that are particularly resistant during amyotrophic lateral sclerosis (ALS) □  
1230 related motoneurone disease. *The Journal of Physiology* **525**:433–445.  
1231 doi:10.1111/j.1469-7793.2000.t01-1-00433.x
- 1232 Ye JH, Zhang J, Xiao C, Kong J-Q. 2006. Patch-clamp studies in the CNS illustrate a simple  
1233 new method for obtaining viable neurons in rat brain slices: Glycerol replacement of  
1234 NaCl protects CNS neurons. *Journal of Neuroscience Methods* **158**:251–259.  
1235 doi:10.1016/j.jneumeth.2006.06.006
- 1236 Zhou Z, Neher E. 1993. Mobile and immobile calcium buffers in bovine adrenal chromaffin  
1237 cells. *The Journal of Physiology* **469**:245–273. doi:10.1113/jphysiol.1993.sp019813  
1238
